# Supplementary material for: Intrinsic Or Extrinsic Motivation In Perceiving Body Weight Among Iranian Women: A Cross Sectional Study
Source: Research Square preprint supplement (doi:10.21203/rs.3.rs-513245/v1), 2021-05-27
Supplement: Supplementary file 1 [file d54af192a42bea8217799cc4.xlsx]

## Sheet: data
code	age	marital	child	occupation	educ	room	personalbed	library	internet	house	automobile	ice	freezer	television	telephone	mobile	computer	labtap	tablet	launderer	dishwasher	micro	coler	cleaner	weight	high	omach	Q1	Q2	Q3	Q4	Q5	Q6	Q7	Q8	Q9	Q10	Q11	Q12	Q13	Q14	Q15	Q16	Q17	Q18	Q19	Q20	Q21	Q22
1	18	2	1	1	10	1	0	0	0	0	0	1	0	0	0	0	0	0	0	1	0	0	0	1	54	161	78	3	3	3	3	4	3	3	4	0	4	0	0	0	0	0	3	3	4	0	0	0	1
2	49	2	3	1	11	3	1	0	0	1	1	1	0	1	0	3	0	0	0	1	0	0	1	1	70	161	90	3	4	4	7	4	0	6	1	6	1	2	2	6	6	6	6	6	6	6	6	0	1
3	39	2	3	1	7	2	0	0	0	1	0	1	0	1	1	1	0	0	0	0	0	0	#NULL!	1	60	160	84	3	1	2	4	4	3	1	4	4	4	4	0	0	0	0	4	4	4	4	4	1	0
4	30	2	3	1	12	3	1	0	1	1	0	1	0	1	1	2	0	0	0	1	0	0	1	1	78	162	99	2	1	4	7	5	1	6	1	3	1	3	3	3	3	3	4	4	6	4	4	1	1
5	37	2	2	2	14	6	1	1	1	1	1	2	1	2	1	3	1	0	1	2	1	1	2	1	69	165	90	2	2	3	4	3	3	4	1	6	1	4	3	6	6	6	6	6	6	6	6	0	1
6	30	1	0	10	16	2	0	0	1	1	0	1	0	1	1	2	0	0	0	1	0	0	0	1	68	140	110	3	3	5	7	4	1	6	1	3	1	0	0	0	0	0	6	6	6	6	6	0	1
6	40	2	2	1	12	2	0	0	0	1	0	1	1	1	0	2	0	0	0	0	0	0	1	0	73	164	95	1	3	2	6	4	3	6	6	6	1	0	0	0	0	0	4	4	4	4	4	0	1
7	46	2	3	1	5	2	0	0	1	1	1	1	0	1	1	3	0	0	0	1	0	0	1	0	75	162	98	3	3	5	5	3	1	6	1	4	1	4	4	0	0	0	6	6	6	6	6	0	1
8	37	2	3	3	16	3	1	1	1	1	1	1	1	1	1	2	1	0	0	1	0	0	1	2	71	159	98	2	3	2	5	4	3	3	3	4	3	3	3	4	4	4	6	6	6	6	6	0	1
9	36	2	3	1	18	3	1	1	1	1	1	1	1	1	1	4	1	1	0	1	1	0	1	1	74	165	94	4	4	3	4	3	1	4	3	4	3	4	4	4	4	4	6	6	6	6	6	0	1
10	27	2	3	1	12	3	0	0	1	1	1	1	1	1	1	2	0	0	1	1	0	0	1	1	75	163	96	3	2	4	6	5	1	6	6	6	1	1	1	6	6	6	6	6	6	6	6	0	1
11	31	2	0	1	18	4	1	1	1	1	1	1	1	1	1	2	0	1	0	1	1	0	1	1	59	157	85	5	3	3	5	4	1	6	6	6	1	4	4	6	6	6	6	6	6	6	6	0	1
12	27	2	1	1	11	3	1	1	1	1	1	1	1	1	1	2	0	0	0	1	0	0	1	1	60	157	85	3	2	2	4	3	1	5	5	5	3	4	4	4	4	4	6	6	4	4	4	0	1
13	31	2	2	12	16	2	1	0	1	0	0	2	0	1	1	2	1	0	0	1	0	0	1	1	91	160	106	5	3	2	5	4	1	6	6	6	1	1	1	6	6	6	6	6	6	6	6	0	1
14	44	2	1	1	5	1	0	0	0	0	0	1	0	0	0	2	0	0	0	1	0	0	0	1	59	154	86	3	3	2	7	5	1	4	4	4	1	4	4	4	4	4	6	5	6	6	6	1	1
15	36	2	3	12	12	1	0	0	0	1	0	1	1	0	0	1	0	0	0	1	0	0	1	1	73	166	102	3	1	2	5	4	1	4	4	5	1	3	3	4	4	4	4	4	4	4	4	0	1
16	36	2	0	1	2	1	0	0	0	0	0	1	0	0	0	2	0	0	0	1	0	0	1	1	74	158	103	3	3	2	5	2	1	6	6	6	1	3	3	6	6	6	5	5	5	5	5	0	1
17	30	2	1	1	12	3	1	0	1	1	1	1	0	1	1	2	0	0	0	1	0	0	1	1	80	159	105	2	3	3	7	5	1	4	4	0	1	2	2	4	4	4	6	6	6	6	6	0	1
18	40	2	2	2	18	8	1	1	1	1	1	1	0	1	1	4	0	1	1	1	1	1	1	2	64	161	90	5	3	5	4	4	4	5	3	6	1	5	4	6	6	6	6	6	6	6	6	0	1
18	40	2	2	1	5	1	0	0	0	0	0	1	1	0	0	1	0	0	0	0	0	0	0	0	82	159	112	2	3	1	8	5	1	6	6	6	1	0	0	0	0	0	4	4	4	4	4	0	1
19	36	2	2	1	8	3	1	0	0	1	0	1	1	0	1	2	0	0	0	1	0	0	0	1	68	160	103	2	1	3	6	4	1	4	4	4	1	3	3	4	4	4	6	6	6	6	6	0	1
20	32	2	2	1	12	2	0	0	0	1	0	1	0	0	0	1	0	0	0	0	0	0	0	1	82	163	108	4	4	4	7	5	1	6	6	6	1	4	4	4	4	4	6	6	6	6	6	0	1
21	44	2	3	3	14	3	1	1	1	1	1	1	1	1	1	3	1	1	0	1	0	0	1	1	86	163	104	3	3	3	5	4	1	6	6	6	1	4	4	4	4	4	6	6	6	6	6	0	1
22	33	2	0	10	11	1	1	0	0	0	0	1	1	0	1	2	0	0	0	1	0	0	0	1	75	156	100	2	3	4	6	4	1	6	6	6	1	3	3	4	4	4	6	6	6	6	6	0	1
23	48	2	3	3	12	3	1	0	0	1	1	1	1	1	1	5	1	0	0	1	0	0	1	1	72	162	90	3	3	4	5	5	1	4	0	4	1	0	0	6	6	6	6	6	6	6	6	0	1
24	37	2	3	12	12	3	1	0	0	1	0	1	1	1	1	2	0	0	0	1	0	0	0	0	68	158	81	3	3	2	7	4	1	6	6	6	1	0	0	0	0	0	6	6	6	6	6	0	1
25	42	2	3	12	5	4	1	0	0	1	1	1	0	0	0	2	0	0	0	0	0	0	1	1	82	159	113	4	3	5	6	4	1	6	6	6	1	4	4	4	4	4	6	6	6	6	6	0	1
26	35	2	2	1	12	3	1	0	1	1	0	1	0	1	0	2	0	0	0	1	0	0	1	1	56	160	80	3	3	3	3	4	1	4	4	3	4	3	3	3	3	3	6	6	4	4	4	0	1
27	31	2	2	1	16	3	1	0	1	1	0	1	0	1	0	2	0	1	0	1	0	0	1	1	71	158	98	3	3	4	6	4	1	6	6	6	1	0	0	6	6	6	4	4	4	6	6	0	1
28	30	2	1	1	12	3	1	0	1	0	0	1	1	1	0	2	0	0	1	1	0	0	1	1	89	166	105	3	3	5	4	3	1	6	6	6	1	3	3	6	6	6	6	6	6	6	6	0	1
29	38	2	3	1	6	3	0	0	0	1	0	1	0	1	0	2	0	0	0	1	0	0	0	1	85	160	90	1	1	1	5	3	1	6	6	6	1	2	2	4	2	4	5	4	4	4	4	0	0
30	40	2	2	3	16	3	1	1	1	1	1	1	1	1	1	2	0	1	1	1	0	0	1	1	54	158	87	3	3	3	3	3	3	3	3	3	1	4	4	0	0	0	6	6	6	0	0	0	1
31	36	2	2	1	16	3	1	0	1	1	0	1	1	1	1	3	0	0	1	1	0	0	1	1	74	160	99	3	3	3	6	4	1	6	6	6	1	3	3	6	6	6	6	6	6	6	6	0	1
32	34	2	1	1	18	0	0	0	0	0	1	1	0	0	0	2	1	0	1	1	0	0	1	1	74	158	99	2	1	1	6	4	1	6	6	6	1	0	0	0	0	0	4	4	4	4	4	0	1
33	36	2	2	1	12	5	1	0	0	1	0	1	0	0	1	2	0	0	0	1	0	0	0	1	68	152	97	2	3	2	6	4	1	6	6	6	1	3	3	4	4	4	6	6	6	6	6	0	1
34	46	2	4	1	12	3	0	0	0	1	0	1	0	1	1	2	0	0	1	0	0	0	1	1	77	158	108	2	3	3	6	5	1	6	6	6	1	4	4	4	4	4	6	6	6	6	6	0	1
35	39	2	3	1	12	3	0	0	1	1	1	1	1	1	1	3	3	0	1	1	0	0	1	1	76	167	100	3	3	4	6	4	1	6	6	6	1	3	3	6	6	6	6	6	6	6	6	0	1
36	41	2	2	1	12	5	1	1	1	2	1	1	0	1	2	2	1	0	0	1	0	0	1	1	64	155	94	3	3	2	5	4	1	6	6	6	1	4	4	4	4	4	6	6	6	6	6	0	1
37	31	2	0	2	16	3	1	0	1	1	1	1	1	1	0	2	0	1	0	1	0	1	1	1	88	154	105	3	3	4	6	4	1	6	6	6	1	4	4	6	6	6	6	5	6	6	6	0	1
38	31	2	2	1	12	3	1	0	0	0	0	1	0	0	0	2	0	0	0	1	0	0	0	1	85	153	105	3	1	3	6	3	1	6	6	6	1	0	0	4	4	4	6	6	6	6	6	0	1
39	49	2	3	1	7	3	1	0	0	1	1	1	0	1	1	3	0	0	1	0	0	1	1	1	62	164	90	3	3	2	3	3	3	3	3	4	1	0	0	0	0	0	6	6	6	6	6	0	1
40	44	2	3	3	18	8	1	1	0	2	1	1	1	1	1	2	1	0	1	1	1	1	1	1	67	157	96	3	3	3	7	4	1	6	6	6	1	3	3	6	6	6	6	6	6	6	6	0	1
41	37	1	0	1	16	3	1	0	1	1	0	1	1	1	1	5	0	1	0	0	0	0	1	1	89	166	104	3	2	5	3	5	1	6	6	4	1	#NULL!	#NULL!	#NULL!	#NULL!	#NULL!	6	6	6	6	6	0	1
42	36	2	4	1	4	3	0	0	0	1	0	1	0	1	0	2	0	0	0	1	0	0	0	1	40	146	69	5	3	5	1	1	3	3	3	3	3	4	4	4	4	4	6	6	6	6	6	0	1
43	34	2	2	1	12	3	1	0	0	1	0	1	1	1	0	2	0	0	0	1	0	0	1	1	75	158	94	3	3	2	7	5	1	6	6	6	1	1	1	6	6	6	6	6	6	6	6	0	1
44	36	1	0	1	12	3	1	1	1	1	0	1	1	1	1	1	0	1	0	1	0	0	1	1	84	162	107	1	2	3	7	5	1	6	6	6	1	#NULL!	#NULL!	#NULL!	#NULL!	#NULL!	6	6	6	6	6	1	0
45	41	2	2	3	16	4	1	1	1	1	1	1	1	1	1	2	1	1	0	1	0	0	3	1	105	170	114	3	3	5	6	4	1	6	6	6	1	5	3	6	6	6	6	6	6	6	6	0	0
46	43	2	5	1	3	2	0	0	0	1	0	1	0	0	1	0	0	0	0	0	0	0	0	1	87	157	113	1	2	2	7	5	1	4	4	4	1	#NULL!	#NULL!	#NULL!	#NULL!	#NULL!	6	6	6	6	6	0	1
47	45	2	3	3	16	4	1	0	1	1	1	1	1	1	1	2	1	0	1	1	0	0	2	1	69	158	99	4	3	3	5	4	1	4	4	4	1	0	0	0	4	0	4	4	4	4	4	0	1
48	37	2	3	3	16	3	1	1	1	1	1	1	1	1	1	2	1	0	0	1	0	0	1	2	71	159	98	2	3	2	5	4	3	3	3	4	3	3	3	4	4	4	6	6	6	6	6	0	1
48	31	2	3	14	5	2	0	0	0	1	1	1	1	1	1	1	0	0	0	1	0	0	1	1	77	161	112	2	3	2	6	4	1	4	4	4	1	2	2	1	1	1	6	6	6	1	3	1	0
49	49	2	1	1	12	3	1	0	1	1	1	2	1	2	2	2	1	0	0	1	0	1	2	1	80	161	116	2	2	3	6	5	1	4	4	4	1	0	0	0	0	0	6	6	6	6	6	0	1
50	31	2	2	1	8	2	0	0	0	1	0	1	0	0	1	2	0	0	0	0	0	0	0	0	67	163	89	2	3	2	4	3	2	4	4	4	3	0	0	0	3	0	4	4	4	4	4	1	1
51	26	2	1	1	16	2	1	0	0	0	0	1	1	1	0	2	0	1	0	1	0	1	0	1	85	155	113	2	1	1	5	4	6	6	6	6	1	1	1	1	6	6	6	6	6	6	6	1	0
52	30	2	2	1	16	3	1	0	1	1	1	1	1	1	1	2	0	0	0	1	0	0	1	1	69	160	93	3	3	3	5	4	1	4	4	4	1	0	0	0	4	0	6	6	6	6	6	0	1
53	41	2	2	1	12	3	1	0	0	1	1	1	1	0	0	3	0	1	1	1	0	1	1	1	72	166	98	3	3	3	5	6	3	3	4	3	3	4	4	4	4	4	4	4	4	4	4	0	1
54	33	2	2	1	12	3	1	0	0	0	1	1	0	1	1	2	0	0	0	1	0	0	1	1	90	164	104	2	3	3	7	4	1	6	6	6	1	0	0	0	4	4	6	6	6	6	6	0	1
55	35	2	3	1	6	1	0	0	0	1	1	1	0	1	1	2	0	0	0	0	0	0	0	0	78	162	90	3	3	4	6	4	2	6	6	6	1	3	3	4	4	4	6	6	6	6	6	0	1
56	24	2	3	1	8	3	1	0	0	1	0	1	0	1	0	2	0	0	0	1	0	0	0	1	64	168	87	3	3	4	3	3	3	3	3	3	3	4	4	0	0	0	6	6	6	6	6	0	0
57	27	2	1	1	16	3	1	0	1	1	1	1	1	1	0	2	0	0	0	1	0	0	0	1	58	154	88	3	2	4	4	3	3	3	3	3	3	3	3	0	0	0	6	6	6	6	6	0	1
58	27	2	1	4	16	2	1	0	0	1	0	1	1	1	1	2	0	0	1	1	0	0	0	1	88	170	90	3	3	3	6	4	1	4	4	4	1	3	3	4	4	4	6	6	6	6	4	1	1
59	49	2	1	1	4	2	1	0	0	1	0	1	0	1	1	1	0	0	1	1	0	0	0	1	56	151	85	2	3	2	4	4	3	0	0	0	0	0	0	0	0	0	6	6	6	6	6	0	0
60	24	2	2	1	12	2	0	0	1	0	0	1	0	1	1	1	0	0	0	1	0	0	1	1	92	174	97	3	3	3	6	4	1	6	6	6	1	2	2	4	4	4	6	6	6	6	6	0	1
61	44	2	2	1	12	2	0	0	1	1	0	1	0	1	1	1	1	0	0	1	0	0	0	1	72	151	107	1	1	1	7	4	1	6	6	6	1	3	3	4	4	4	6	6	6	6	6	1	1
62	25	2	2	1	16	2	0	0	1	1	0	1	0	1	1	2	1	0	0	1	0	1	1	1	70	161	93	2	3	2	5	4	1	4	4	4	1	3	4	4	4	4	6	6	6	6	6	1	1
64	24	2	1	1	16	2	1	0	1	1	0	1	1	1	0	2	0	1	0	1	0	1	1	1	72	161	95	3	4	3	5	4	1	0	0	0	3	0	0	0	0	0	4	3	3	3	3	1	1
65	19	2	2	1	9	2	0	1	1	0	1	1	0	1	0	2	1	0	0	1	0	1	0	1	56	150	91	2	3	3	5	5	4	0	0	0	0	4	4	0	0	0	5	5	5	4	4	0	1
66	42	2	3	1	5	3	0	0	0	1	0	1	0	1	1	1	0	0	0	0	0	0	1	1	98	158	120	2	1	1	9	3	1	6	6	6	1	3	3	4	4	4	4	4	4	4	4	1	0
67	40	2	3	3	16	3	1	1	1	1	1	1	1	1	1	2	1	0	1	1	0	1	1	1	69	159	90	4	3	2	4	3	3	3	3	3	3	4	4	4	4	4	4	4	4	4	4	0	0
68	30	2	2	1	5	1	0	0	0	0	0	1	0	1	0	2	0	0	0	0	0	0	1	0	90	162	113	5	3	2	7	1	1	6	6	6	1	0	0	4	4	4	6	6	6	6	6	0	0
69	28	2	2	1	12	2	0	0	0	0	0	1	0	1	0	2	0	0	0	0	0	0	0	1	58	158	90	2	3	3	5	5	5	3	3	3	3	0	0	0	0	0	4	4	4	4	4	0	1
70	40	2	3	1	12	6	1	1	1	2	2	2	2	2	1	3	1	1	2	2	2	2	2	2	68	163	93	5	2	5	5	4	3	0	0	0	0	4	4	4	4	4	6	6	6	6	6	0	0
71	24	2	0	3	16	3	0	1	1	1	0	1	1	1	1	1	0	2	1	1	0	0	1	1	80	158	100	3	4	3	6	4	1	6	6	6	1	6	5	0	0	0	6	5	6	6	6	0	1
72	36	2	2	12	12	3	1	0	1	1	0	1	0	1	1	2	1	0	0	1	0	0	1	1	62	162	89	3	3	4	4	3	2	4	4	4	3	0	0	0	0	0	4	4	4	4	4	0	1
73	49	2	4	1	12	2	1	0	1	0	0	1	1	1	1	1	0	0	0	1	0	0	1	1	61	160	87	4	3	3	2	2	5	6	6	6	1	6	6	6	6	6	6	6	6	6	6	0	0
74	31	2	2	3	18	3	1	1	1	3	1	1	0	1	1	2	0	1	0	1	0	1	1	1	68	163	90	5	2	5	4	4	1	4	4	4	3	3	3	6	6	6	6	6	6	6	6	0	1
75	39	2	2	1	12	3	1	0	1	0	1	1	1	1	0	3	0	0	1	0	0	0	1	1	59	159	85	3	3	3	6	5	3	0	0	0	1	3	4	4	4	4	4	4	4	4	4	0	0
76	33	2	1	1	12	3	1	0	1	1	1	1	1	2	1	2	0	1	0	1	0	0	1	1	98	162	107	3	3	3	5	5	1	6	6	6	1	4	2	0	0	0	6	6	6	6	6	0	0
77	36	2	2	1	5	1	1	0	0	0	0	1	0	0	0	2	0	0	0	0	0	0	0	1	95	165	120	2	2	3	8	5	1	6	6	6	1	3	3	4	4	4	6	6	6	6	6	1	1
78	43	2	1	1	9	3	1	0	1	1	0	1	1	1	1	2	0	0	0	1	0	0	1	1	54	160	83	2	3	4	4	4	6	4	4	4	3	3	3	0	0	0	6	6	6	4	4	1	0
79	33	2	1	1	12	9	1	0	1	1	1	1	1	2	1	1	0	0	1	1	0	1	1	1	87	163	99	3	3	3	7	6	1	6	6	6	1	1	1	6	6	6	6	6	6	6	6	0	0
80	25	2	1	1	12	4	1	0	1	0	0	1	1	1	0	1	0	0	0	1	0	0	0	1	68	155	96	5	3	5	5	3	3	3	3	3	3	4	4	0	0	0	5	5	5	5	5	0	1
81	33	2	2	3	12	3	1	1	1	1	1	1	1	1	1	3	0	1	1	1	0	0	1	1	70	166	92	3	3	4	5	4	3	6	6	6	1	6	6	4	4	4	6	6	6	6	6	0	1
82	4	1	0	2	16	5	1	1	1	2	1	1	1	2	1	4	1	1	0	1	0	0	1	1	67	161	92	3	2	5	5	4	2	6	6	6	1	#NULL!	#NULL!	#NULL!	#NULL!	#NULL!	4	5	6	6	6	0	1
83	49	2	4	1	5	3	1	1	0	1	0	1	0	1	1	4	0	1	0	1	0	0	1	1	75	160	100	3	3	3	6	6	1	4	4	4	1	4	4	4	4	4	4	4	4	4	4	0	1
84	30	2	2	1	12	3	1	1	1	1	1	1	1	1	1	1	0	0	0	1	0	0	1	1	73	160	94	3	1	3	4	4	2	4	4	4	3	4	4	0	0	0	6	6	6	6	6	1	0
85	25	2	1	1	12	2	0	0	0	0	0	1	0	1	0	2	0	0	0	0	0	0	1	0	53	156	74	3	2	3	2	5	1	6	6	1	6	1	1	1	3	3	3	4	4	3	3	1	1
86	36	2	2	1	16	3	0	0	0	0	0	1	1	1	0	2	0	0	0	1	0	0	1	1	100	164	116	2	3	4	7	4	1	4	4	6	1	0	0	0	4	4	6	6	6	6	6	0	1
87	29	2	2	1	5	2	0	0	1	1	0	1	0	0	1	2	0	0	0	1	0	0	1	1	71	159	99	2	1	2	5	3	1	6	6	6	1	3	3	4	6	6	5	5	6	6	6	0	1
88	32	2	2	1	12	3	0	0	1	1	1	1	0	1	1	2	0	0	1	1	0	0	1	1	67	149	95	3	3	3	7	4	1	6	6	6	1	0	0	0	0	0	4	4	6	6	6	0	1
89	29	2	2	1	5	3	0	0	1	1	0	1	1	1	1	2	0	0	0	0	0	0	1	1	71	159	85	3	3	4	5	3	2	4	4	4	1	3	4	4	4	4	6	6	6	6	6	0	1
90	25	2	1	1	7	2	0	0	0	0	0	1	0	1	0	2	0	0	1	0	0	0	0	1	58	156	96	3	3	3	5	5	4	3	3	3	3	4	4	4	4	4	6	6	5	6	6	0	1
91	43	2	0	1	12	2	1	1	1	1	0	2	0	1	1	3	1	0	0	1	0	0	1	1	92	155	116	2	2	3	7	5	1	4	4	4	1	3	3	4	4	4	6	6	6	4	4	0	1
92	35	2	3	1	12	2	0	0	0	0	1	1	0	0	1	2	0	0	1	1	0	0	0	1	68	156	102	3	3	2	7	5	1	6	6	6	1	2	2	4	4	4	6	5	6	6	6	0	1
93	48	2	2	3	14	3	1	0	1	1	1	1	0	0	1	3	0	0	0	1	0	0	1	0	108	176	114	3	3	3	6	2	1	6	6	6	1	0	0	0	0	0	6	6	6	6	6	0	1
94	35	1	0	1	12	4	0	0	0	1	1	1	1	1	1	3	1	0	0	1	0	0	1	1	79	158	95	4	3	3	7	5	1	6	6	6	1	#NULL!	#NULL!	#NULL!	#NULL!	#NULL!	6	6	6	6	6	0	1
95	39	2	2	1	12	4	1	1	1	1	1	2	1	2	1	4	2	1	1	1	1	1	4	1	70	164	97	4	3	3	5	5	1	6	3	6	1	4	4	4	4	4	6	3	2	6	6	0	1
96	43	2	3	1	12	3	1	0	1	1	1	1	0	1	1	2	1	0	0	1	0	0	1	1	60	154	90	4	4	3	4	4	3	4	4	3	4	2	4	4	4	4	5	5	4	3	3	1	1
97	45	2	3	3	16	6	1	0	1	2	1	1	1	1	1	3	1	0	1	1	1	0	4	1	93	162	102	4	3	3	5	4	1	4	4	3	1	0	0	0	0	0	6	2	4	0	6	0	0
98	43	2	3	3	16	3	1	1	1	1	1	1	1	1	1	2	0	0	0	1	0	1	1	1	82	161	107	1	3	3	7	5	1	6	6	4	1	3	3	4	2	4	6	6	4	4	4	1	1
99	24	2	2	1	9	4	1	0	0	1	1	1	1	0	0	2	0	0	0	0	0	0	1	1	60	160	85	3	3	3	3	2	3	4	4	4	1	2	2	4	3	4	4	4	3	5	4	0	1
100	30	1	0	1	12	3	1	0	0	1	0	1	0	1	1	1	0	0	0	1	0	0	0	1	8	162	100	3	4	3	7	4	1	4	4	4	3	#NULL!	#NULL!	#NULL!	#NULL!	#NULL!	6	6	6	6	6	0	0
101	35	2	3	1	12	2	1	0	1	1	0	1	0	1	0	3	0	0	0	0	0	0	0	0	92	162	107	3	2	4	7	4	1	6	6	6	1	3	3	4	4	4	4	4	4	4	4	0	1
102	32	2	2	1	16	3	1	1	1	1	1	1	1	1	1	2	0	0	0	1	0	0	1	1	52	160	85	3	4	5	4	5	1	1	1	1	6	4	4	4	4	4	6	6	6	6	6	0	1
103	31	2	1	1	12	3	1	1	1	1	1	1	1	1	1	2	0	1	0	1	0	0	1	1	98	165	105	3	1	3	7	5	1	6	6	6	1	0	0	0	0	0	3	3	4	6	0	0	1
104	39	2	1	1	14	2	1	1	1	1	1	1	1	1	1	1	0	0	1	1	0	0	1	1	79	161	95	3	2	2	7	5	1	6	6	6	1	4	3	4	4	4	5	5	5	3	3	1	1
105	25	2	1	1	12	2	1	0	1	0	0	1	1	1	0	2	0	0	0	1	0	1	1	1	61	163	78	3	3	2	4	4	4	4	4	4	4	4	4	4	4	4	6	6	6	6	6	0	1
106	29	2	2	1	12	3	1	1	1	1	1	1	1	1	1	2	1	0	0	1	0	0	1	1	78	163	100	3	2	4	5	4	1	6	6	6	1	5	5	4	4	4	6	6	6	6	6	0	1
107	27	2	1	1	16	2	1	0	1	0	0	1	0	1	1	2	0	1	0	1	0	0	1	1	74	162	94	3	3	2	5	4	1	4	4	4	3	4	4	4	4	4	6	5	6	6	5	0	0
108	27	2	2	1	6	2	0	0	0	0	0	1	1	1	0	2	0	0	0	1	0	0	1	1	87	163	108	5	1	2	6	3	1	6	6	6	1	1	1	4	4	4	6	6	6	6	6	1	1
109	38	2	2	1	5	2	1	0	0	0	1	1	1	1	1	2	0	0	0	1	0	0	0	1	79	154	109	3	3	3	7	3	1	6	6	6	1	1	1	0	0	0	6	6	6	6	6	1	0
110	30	2	2	1	12	3	1	1	1	1	0	1	1	1	1	2	1	0	0	1	0	1	1	1	69	167	89	3	3	2	4	3	3	6	6	6	1	3	3	4	4	4	6	6	6	6	6	0	0
111	33	2	2	10	12	2	0	0	1	1	1	1	0	1	1	2	1	0	1	0	1	0	1	1	76	155	95	2	1	3	6	4	1	4	4	4	3	0	0	0	0	0	3	3	0	4	4	0	0
112	38	2	4	10	5	2	0	0	0	1	0	1	0	1	0	2	0	0	0	1	0	0	0	1	76	162	94	2	1	2	5	3	1	6	6	6	1	4	4	4	4	4	4	4	4	4	4	0	0
113	46	2	2	3	16	4	1	1	1	1	1	1	1	1	1	4	1	1	1	1	0	1	4	1	74	159	99	3	3	3	6	4	1	6	6	6	1	0	0	0	0	0	6	6	6	6	6	0	0
114	32	1	0	1	12	3	0	0	0	0	1	1	1	1	1	2	0	0	0	1	0	0	0	0	70	160	95	3	3	2	4	4	3	1	1	1	4	5	3	4	4	4	6	6	3	4	4	1	0
115	32	2	3	1	8	2	0	0	0	1	0	1	1	1	1	3	0	0	0	1	0	0	0	1	61	161	87	3	2	2	5	5	3	1	1	1	1	4	4	4	4	4	4	4	4	4	4	1	0
116	46	2	1	14	8	2	1	0	1	1	0	1	0	1	1	4	0	0	0	1	0	0	1	1	87	161	107	3	2	3	6	4	1	6	6	6	1	3	3	0	0	0	6	6	6	6	6	0	0
117	28	2	0	3	16	2	1	1	1	1	1	1	1	1	1	1	0	1	1	1	0	0	0	1	85	165	120	2	1	3	7	4	1	6	6	6	1	6	6	6	6	6	6	6	6	6	6	0	1
118	38	2	3	1	5	3	0	0	0	0	0	1	0	1	0	2	0	0	0	1	0	0	0	1	62	154	93	3	4	2	6	1	2	4	4	4	3	4	4	0	0	0	4	4	4	4	4	0	1
119	41	2	2	1	12	2	0	0	0	0	0	1	0	1	1	2	0	0	0	1	0	0	0	1	60	153	96	3	2	2	4	3	3	4	4	4	3	0	0	0	0	0	4	4	4	4	4	0	1
120	40	2	2	1	12	3	1	0	1	1	1	1	1	1	1	1	1	0	0	1	0	0	1	1	68	158	92	3	3	2	5	4	3	3	3	6	1	4	4	4	4	4	6	6	6	6	6	0	1
121	38	2	1	1	12	3	1	0	1	1	0	1	0	1	1	3	1	0	0	1	0	0	0	1	86	165	111	2	2	4	6	4	1	4	4	3	4	4	4	4	4	4	4	4	4	4	4	0	1
122	36	2	3	1	5	3	0	0	0	0	0	1	0	1	1	2	1	1	1	1	0	0	0	1	91	156	114	2	1	2	7	5	1	6	6	6	6	4	4	4	4	4	4	3	4	4	4	0	1
123	19	2	0	1	12	3	1	0	0	1	0	1	0	1	0	3	0	0	0	1	0	1	0	1	64	158	86	4	2	5	5	4	3	6	6	6	3	6	6	6	0	6	6	6	6	4	6	1	0
124	40	2	2	2	18	4	1	1	1	1	1	1	1	1	1	4	1	1	1	1	0	0	1	1	56	161	77	3	3	5	4	5	3	4	3	6	1	4	4	0	0	0	6	6	6	6	6	0	0
125	47	2	1	5	16	3	1	0	1	1	0	1	1	1	1	3	1	0	1	1	0	0	1	1	68	150	90	3	2	2	5	2	2	6	6	6	1	0	0	0	0	0	6	6	6	6	6	0	1
126	46	2	3	12	8	30	0	0	0	1	1	1	0	1	1	2	1	0	0	1	0	0	1	1	78	157	120	3	1	3	9	3	1	6	6	6	1	5	5	4	6	6	6	6	6	6	6	0	0
127	28	2	1	2	16	3	1	0	0	0	1	1	1	1	0	2	0	1	1	1	0	0	1	1	67	161	78	3	3	3	4	3	2	6	5	6	1	5	5	5	5	5	6	6	6	6	6	0	1
128	36	2	2	2	16	6	1	0	1	2	1	1	1	2	0	3	0	1	0	1	1	1	4	1	90	155	115	1	2	4	8	5	1	6	6	5	1	5	3	6	5	3	3	3	6	4	4	0	0
129	48	2	2	2	16	3	1	1	1	1	1	1	1	1	1	4	1	0	0	1	1	0	1	1	100	158	120	3	1	1	7	4	1	6	6	6	3	6	5	3	3	3	6	4	4	6	6	0	1
130	28	2	3	1	12	3	1	0	1	1	0	1	1	0	0	3	0	0	0	0	0	0	1	1	73	160	90	3	3	5	5	4	1	6	6	6	1	4	4	4	4	4	6	6	6	6	6	0	1
131	34	2	2	1	18	4	1	1	1	1	1	1	0	0	1	2	1	0	0	2	1	0	2	1	76	155	93	4	3	4	7	5	1	6	6	6	1	2	2	4	6	6	6	6	6	6	6	0	1
132	27	2	1	15	16	3	1	0	1	1	0	1	1	1	1	2	0	1	0	1	0	1	1	1	59	156	85	2	2	2	5	4	1	6	6	6	1	4	4	4	4	4	6	6	6	6	6	0	1
133	42	2	4	1	14	4	1	1	1	1	1	1	1	2	1	4	1	1	1	1	1	1	1	1	76	160	110	3	3	3	6	5	1	5	5	6	1	4	4	4	6	4	6	6	6	6	6	0	1
134	41	2	3	1	8	3	1	0	1	1	0	1	0	1	1	3	0	0	0	1	0	0	0	1	83	153	105	2	3	2	7	5	6	6	6	1	1	0	0	0	4	4	3	5	3	6	6	1	1
135	35	2	2	1	16	3	1	0	1	1	0	1	1	1	1	2	1	0	0	1	0	1	1	1	63	150	91	3	3	3	6	4	1	6	6	6	1	3	3	6	6	6	6	6	6	6	6	0	1
136	30	2	2	2	16	1	0	1	1	0	1	1	1	1	0	3	0	1	0	1	0	0	1	1	63	150	91	2	3	4	5	3	1	6	6	6	1	2	2	4	4	4	6	6	6	6	6	0	1
137	36	2	2	1	5	2	1	0	0	1	0	1	0	0	0	2	0	0	0	1	0	0	0	0	49	155	79	3	3	5	4	5	1	6	6	3	6	0	0	0	6	0	6	6	6	6	6	0	1
138	39	2	4	15	12	3	1	0	1	1	1	1	1	1	1	3	1	0	0	1	0	0	1	1	75	154	100	3	3	3	6	5	1	6	6	6	1	0	4	4	4	4	6	6	6	6	6	0	1
139	37	2	2	15	5	3	1	0	1	1	0	1	1	0	0	2	0	0	0	1	0	0	1	0	65	159	87	3	3	3	5	4	1	4	4	4	1	4	4	4	4	4	6	6	6	6	6	0	1
140	28	2	2	1	12	3	1	1	1	1	1	1	0	1	1	2	0	0	1	1	0	0	1	1	67	164	93	3	2	4	5	4	1	4	4	4	1	4	4	4	4	4	6	6	4	4	4	0	1
141	28	2	1	1	14	2	1	0	1	1	0	1	0	1	0	2	0	0	0	1	0	0	1	1	46	157	75	3	3	2	3	4	3	4	4	3	4	2	2	2	2	2	4	4	5	5	5	0	1
142	35	2	2	3	16	3	1	1	1	1	0	1	1	0	0	2	1	0	1	1	0	1	0	1	76	160	105	3	3	2	6	3	1	6	6	6	1	3	4	6	6	6	6	6	6	6	6	0	1
143	24	2	1	1	8	3	1	0	1	1	0	1	0	1	0	2	0	0	0	0	0	0	0	1	112	170	120	3	1	2	8	5	1	6	6	6	1	3	3	6	6	6	6	6	6	6	6	0	1
144	32	2	2	4	18	3	1	1	1	0	1	1	0	1	1	2	1	0	0	1	0	0	1	1	59	156	89	3	3	5	5	4	2	4	4	4	1	2	4	4	4	4	6	6	4	6	6	0	1
145	3	2	2	13	10	3	1	0	1	0	0	1	1	0	1	2	0	0	1	1	0	0	1	1	80	164	102	1	1	2	6	4	1	6	6	6	1	3	3	4	4	4	6	6	6	6	6	0	1
146	31	2	2	1	16	3	1	1	1	1	1	1	1	1	1	2	1	0	1	1	0	1	1	1	64	158	96	3	3	3	5	4	1	5	5	3	1	4	4	3	3	0	4	4	4	0	0	0	1
147	3	2	2	1	8	2	0	0	0	0	0	1	0	0	0	1	0	0	0	1	0	0	0	1	55	156	78	3	3	2	4	4	3	3	3	4	1	#NULL!	#NULL!	#NULL!	#NULL!	#NULL!	6	6	6	6	6	0	1
148	29	2	0	1	12	1	1	0	1	0	0	1	0	1	1	2	0	0	0	1	0	0	1	1	92	158	120	3	4	3	7	4	1	6	6	6	1	0	0	4	4	4	6	6	6	6	6	0	1
149	45	2	2	3	16	4	1	0	1	1	1	1	0	1	1	4	1	1	0	1	0	0	3	1	97	163	113	4	2	2	7	5	1	6	6	6	1	3	3	6	6	6	6	6	6	6	6	0	1
150	28	2	2	12	12	2	0	0	0	1	0	1	1	1	0	2	0	0	0	1	0	1	1	0	67	167	8	4	4	3	4	4	3	4	4	6	1	4	4	4	4	4	6	6	6	6	6	0	0
151	36	2	2	1	6	4	1	0	1	0	0	1	1	1	1	3	0	0	1	1	0	0	1	1	76	172	80	3	4	5	6	3	1	6	6	6	2	6	6	6	6	6	6	6	6	6	6	0	1
152	47	2	4	1	7	3	1	0	1	1	1	1	1	1	1	6	1	1	0	1	0	0	1	1	97	154	113	3	3	5	7	4	1	6	6	6	1	0	0	0	0	0	4	4	4	4	4	0	1
153	38	2	0	1	12	2	1	0	0	0	1	1	1	0	1	3	1	0	1	0	0	0	1	1	96	163	109	2	2	2	7	4	1	6	6	6	1	4	4	4	4	4	6	6	6	6	6	0	1
154	37	1	0	12	8	5	1	1	1	1	1	1	1	0	1	4	1	0	0	1	0	0	0	1	61	162	79	3	3	3	3	3	5	3	4	4	2	#NULL!	#NULL!	#NULL!	#NULL!	#NULL!	4	4	4	4	4	0	1
155	31	2	1	2	16	3	1	1	1	1	1	1	1	1	1	2	0	0	0	1	0	0	1	1	74	161	91	3	2	3	4	3	1	6	6	4	1	2	2	6	6	6	6	6	6	6	6	0	1
156	31	2	1	1	16	2	1	0	0	1	0	1	1	0	1	1	0	0	0	1	0	0	1	1	90	16	98	1	2	4	5	4	1	6	6	6	1	3	3	6	6	6	4	4	4	6	6	0	1
157	29	2	1	2	18	2	1	0	1	0	0	1	1	1	1	2	0	1	1	1	0	0	1	1	79	164	93	3	3	4	5	4	1	6	6	6	1	4	4	4	4	4	6	6	6	6	6	0	1
158	37	2	2	12	12	4	1	1	1	1	1	1	1	1	1	4	1	0	0	1	0	0	1	1	72	174	85	2	3	4	4	4	4	0	0	6	1	6	6	6	6	6	6	6	6	6	6	0	1
159	36	2	1	2	16	4	1	1	1	0	1	1	1	1	1	2	0	1	0	1	0	1	1	1	62	155	75	3	3	2	4	2	1	6	6	6	1	4	4	0	4	4	4	4	4	4	4	0	1
160	43	2	3	1	5	2	0	0	0	1	1	1	1	1	1	4	1	0	0	1	0	0	1	1	94	151	110	3	3	3	7	6	1	6	6	4	1	3	0	4	6	4	4	4	4	4	4	0	0
161	38	2	2	1	8	3	1	0	1	1	1	1	0	1	1	3	1	0	0	1	0	0	1	1	106	164	121	2	1	3	7	5	1	6	6	6	1	0	0	4	4	4	6	3	4	6	6	0	1
162	37	2	3	10	6	3	1	0	1	1	0	1	0	0	0	2	1	0	2	1	0	0	0	1	60	161	87	2	2	2	2	3	5	0	0	4	3	4	4	4	4	4	6	6	6	6	6	0	1
163	45	2	4	1	0	3	0	0	0	1	0	1	0	0	1	5	1	0	0	0	0	0	0	1	89	165	120	3	3	3	6	5	1	6	6	6	1	0	0	4	4	4	4	4	4	4	4	0	0
164	18	2	0	1	16	3	1	0	1	1	0	1	0	0	1	5	0	0	0	1	0	0	0	1	67	155	85	4	3	3	5	4	2	6	6	5	1	5	5	0	4	4	4	4	4	4	4	0	0
165	6	2	2	1	12	3	1	0	1	1	1	1	0	1	1	2	1	0	1	1	0	0	1	1	62	158	90	4	3	4	3	3	5	0	0	0	3	4	4	4	4	4	4	4	4	4	4	0	1
166	31	2	2	1	12	3	1	0	1	0	0	1	1	1	1	4	0	0	1	1	0	0	0	1	96	166	109	3	4	4	7	5	1	7	7	3	1	0	0	0	0	0	4	4	4	4	4	0	1
167	25	2	2	5	16	3	1	1	1	1	1	1	0	1	1	2	1	1	0	1	1	0	1	1	74	160	97	2	1	3	6	4	1	6	6	6	1	3	3	4	4	4	6	6	6	6	6	0	1
168	36	2	2	1	12	3	1	0	1	1	1	1	0	1	0	2	0	0	1	1	0	0	0	1	85	166	105	3	2	2	6	4	1	6	6	6	1	4	3	6	6	6	6	6	6	6	6	0	0
169	38	2	1	1	5	1	0	0	0	1	0	1	0	0	1	3	1	0	0	0	0	0	1	0	52	163	76	3	2	2	2	4	1	6	6	3	6	#NULL!	#NULL!	#NULL!	#NULL!	#NULL!	4	4	4	4	4	0	1
170	33	2	2	1	16	4	1	0	1	1	1	1	1	1	1	2	0	0	0	1	0	1	1	1	92	170	97	4	2	4	6	4	1	6	6	6	1	5	2	6	5	6	6	6	6	6	6	0	1
171	49	2	2	2	12	3	1	1	1	1	1	1	0	3	1	5	2	1	1	1	0	0	1	2	86	162	115	3	2	3	6	3	1	6	6	6	1	0	0	4	4	4	6	6	6	6	6	0	1
172	40	2	2	2	18	6	1	1	1	2	1	2	1	2	1	3	1	1	0	1	0	0	2	1	64	151	95	3	1	3	6	4	2	6	6	4	1	1	1	6	5	6	6	6	6	4	5	1	0
173	25	2	1	1	16	3	1	0	1	1	0	1	0	1	0	2	0	1	0	1	0	1	0	1	46	151	75	2	2	3	3	3	3	3	3	3	3	4	4	0	0	0	4	4	4	0	0	1	1
174	32	2	2	12	12	2	1	0	0	0	0	1	0	1	1	2	1	0	0	0	0	0	0	0	71	157	92	2	3	3	5	5	3	5	3	6	1	0	0	0	0	0	6	6	6	6	6	0	0
175	31	2	1	8	16	6	1	1	1	2	1	1	1	2	1	2	1	0	1	1	1	1	1	1	57	163	80	3	3	2	4	4	4	6	4	6	1	6	5	6	4	6	6	6	6	6	6	0	1
176	48	2	4	1	5	5	1	0	1	1	1	1	0	1	1	3	0	0	0	1	0	0	1	1	66	158	105	3	1	3	6	3	1	6	6	5	1	1	1	6	6	6	6	6	6	6	6	0	1
177	36	2	2	22	18	3	1	1	1	1	0	1	1	1	1	2	1	1	0	1	0	1	1	1	69	160	90	4	3	4	4	3	1	6	6	6	1	0	0	6	6	6	6	6	6	6	6	0	0
178	40	2	2	2	18	8	1	1	1	1	1	1	0	1	1	4	0	1	1	1	1	1	1	2	64	161	90	5	3	5	4	4	4	5	3	6	1	5	4	6	6	6	6	6	6	6	6	0	1
179	19	2	1	1	11	1	0	0	1	0	0	1	0	1	0	2	0	0	0	0	0	0	0	0	52	166	75	3	1	2	2	4	1	6	6	1	6	2	2	3	0	0	4	3	6	4	4	0	1
180	35	2	2	1	4	3	1	0	1	1	1	1	0	1	1	2	1	0	0	1	0	0	1	1	75	160	93	2	1	2	5	4	3	4	4	4	1	4	4	4	4	4	4	4	4	4	4	0	1
181	25	2	1	1	12	2	1	0	0	0	1	1	1	0	1	2	0	0	0	1	0	1	1	1	53	155	87	3	4	3	4	4	3	3	3	3	3	4	4	4	4	4	6	4	3	3	3	1	1
182	30	2	1	1	16	3	1	0	0	0	0	1	1	1	0	2	0	1	0	1	0	1	0	1	87	160	111	2	3	2	7	5	1	1	1	1	6	3	3	0	0	0	4	4	4	4	4	0	0
183	43	2	2	2	12	3	1	0	1	1	0	1	1	2	0	4	1	0	0	1	0	1	1	1	77	150	105	4	3	3	6	4	1	4	4	4	1	0	3	4	4	4	4	4	4	4	3	1	1
184	36	2	3	1	12	2	1	1	1	1	1	1	0	1	1	2	0	0	0	1	0	0	0	1	64	158	96	3	2	4	6	4	0	3	3	3	3	4	4	4	4	4	6	4	4	4	4	0	1
185	4	2	3	2	12	2	0	0	0	0	1	1	1	1	0	1	1	0	1	1	0	0	0	1	89	164	109	3	3	2	7	5	1	4	4	4	3	5	3	4	4	4	4	4	4	4	4	0	0
186	25	2	2	1	16	3	1	0	1	1	0	1	0	1	0	2	1	0	0	1	0	0	1	1	60	162	81	3	3	2	4	5	2	3	3	3	4	3	3	2	2	2	4	4	4	4	4	0	0
187	25	2	3	1	12	1	0	0	1	0	0	1	1	1	0	1	0	0	0	0	0	0	0	0	90	163	110	1	2	2	7	4	2	6	6	6	1	0	0	0	0	0	5	5	5	5	5	0	1
188	34	2	2	1	12	2	0	0	0	0	0	1	1	1	1	1	1	0	0	1	0	0	0	1	66	158	90	1	1	2	6	5	6	6	6	1	4	4	4	4	4	4	6	6	6	6	6	0	1
189	30	2	2	1	18	3	1	1	1	1	2	1	0	1	1	3	0	1	1	1	0	1	1	1	54	156	76	2	2	2	4	3	5	4	4	4	1	6	6	4	4	4	6	6	6	6	6	0	1
190	39	1	0	1	16	3	0	0	1	1	1	1	1	1	1	3	1	1	0	1	0	0	2	1	62	164	85	3	3	5	5	4	3	5	5	5	1	#NULL!	#NULL!	#NULL!	#NULL!	#NULL!	4	0	6	5	4	0	1
191	33	1	0	1	12	3	0	0	1	1	0	1	1	1	1	3	1	0	0	1	0	0	1	1	106	164	125	3	3	2	9	5	1	6	6	6	1	#NULL!	#NULL!	#NULL!	#NULL!	#NULL!	6	6	6	6	6	0	0
192	40	1	0	1	16	3	0	0	1	1	1	1	0	1	1	2	1	0	0	1	0	0	1	1	71	161	93	3	3	3	5	4	3	4	4	4	1	#NULL!	#NULL!	#NULL!	#NULL!	#NULL!	4	4	4	4	4	0	0
193	40	2	2	1	12	3	1	0	1	1	0	1	1	1	1	2	0	1	0	0	0	0	1	1	86	172	98	3	3	4	5	4	1	6	6	6	1	4	2	4	4	4	6	6	6	6	6	0	0
194	24	2	1	1	14	3	1	0	0	1	0	1	1	1	1	2	1	1	0	1	0	0	1	1	49	165	66	2	3	3	2	3	1	1	1	1	1	4	4	4	4	4	6	6	6	6	6	0	0
195	28	2	1	1	16	3	1	0	1	1	0	1	1	1	0	2	1	0	0	1	0	0	1	1	65	161	87	3	3	3	2	1	1	5	5	5	1	4	4	4	4	4	4	4	4	4	4	1	1
196	38	2	2	3	14	5	1	0	1	2	0	1	1	1	0	2	0	0	1	1	0	0	1	1	57	158	76	2	2	3	4	4	3	0	0	0	0	0	0	0	0	0	0	0	0	4	4	0	1
197	49	2	2	14	6	3	1	0	0	1	0	1	1	1	1	3	1	1	0	1	0	0	1	1	91	162	110	2	2	2	7	3	1	6	6	6	1	3	3	4	4	4	6	6	6	6	6	1	1
198	40	2	2	2	12	6	1	0	1	1	1	1	0	1	1	3	1	0	1	1	0	0	1	1	57	158	78	3	3	4	4	4	5	1	1	1	1	4	6	4	4	4	4	4	4	4	4	1	1
199	1	2	2	1	12	4	1	0	1	0	0	1	1	1	1	2	1	1	0	0	0	0	0	1	59	154	80	4	3	2	4	4	3	3	3	0	3	0	0	0	0	0	6	6	6	6	6	0	0
200	22	2	1	1	12	3	1	1	1	0	0	1	1	1	0	1	1	1	1	0	0	0	1	1	54	156	83	2	4	2	5	3	3	6	6	6	1	5	4	4	4	4	6	6	6	6	6	0	0
201	34	2	2	1	8	3	1	0	1	1	1	1	0	1	0	2	0	0	1	1	0	0	1	1	56	167	78	1	2	2	3	4	3	1	1	2	1	3	3	0	0	0	6	6	6	6	6	0	0
202	49	2	3	1	1	3	0	0	0	1	0	1	0	1	0	2	0	0	0	0	0	0	0	0	83	161	105	1	2	2	7	6	1	4	4	4	3	0	0	0	0	0	4	4	4	4	4	0	0
203	45	2	2	1	4	2	0	0	0	1	0	1	1	1	0	1	0	0	0	0	0	0	0	1	70	169	96	1	2	3	7	4	1	6	6	6	1	6	1	4	4	4	6	6	6	6	6	0	0
204	9	2	3	3	18	4	1	1	1	1	1	2	1	3	1	3	1	1	0	1	0	0	2	1	69	161	91	4	3	4	4	3	2	6	6	6	1	5	5	4	4	4	6	6	6	6	6	0	0
205	41	2	4	2	2	3	1	0	0	1	0	1	0	1	0	2	0	0	0	0	0	0	0	0	68	161	88	2	4	2	4	4	2	1	1	1	1	4	4	4	4	4	4	4	4	4	4	0	1
206	32	2	3	1	12	2	0	0	1	1	0	1	1	1	1	2	1	0	0	1	0	0	1	1	74	160	99	3	1	2	4	3	1	6	6	6	1	0	0	0	0	0	4	4	4	4	4	1	0
207	41	2	3	1	5	3	1	1	0	1	1	1	1	1	1	3	0	1	0	1	0	0	1	1	80	155	115	1	2	3	8	3	1	6	6	6	1	0	3	4	4	4	4	4	4	4	4	1	1
208	32	2	3	1	12	8	1	0	1	4	1	1	1	1	1	2	0	0	1	1	0	0	2	1	123	162	124	3	1	3	8	5	1	6	6	6	1	0	0	0	0	0	6	6	6	6	6	0	1
209	34	2	1	1	5	2	0	0	0	1	1	1	0	1	0	2	0	0	0	1	0	1	1	0	41	154	70	2	2	2	3	5	1	2	2	2	5	4	4	4	4	4	4	4	4	4	4	0	1
210	47	2	4	1	0	3	0	0	0	1	1	1	0	1	1	3	0	0	0	1	0	0	0	0	65	155	91	2	1	2	2	2	4	3	3	3	3	0	0	0	0	0	4	4	4	4	4	0	0
211	43	2	2	3	18	6	1	1	1	2	1	1	1	3	2	4	1	1	0	1	1	1	2	2	61	161	89	3	3	3	4	4	3	3	3	3	3	6	6	4	4	4	6	6	6	6	6	0	1
212	43	2	3	1	12	3	1	0	1	1	1	1	1	1	1	2	1	0	0	1	0	1	1	1	67	160	88	4	3	2	5	4	3	4	4	4	1	6	4	4	4	4	6	6	6	4	4	0	0
213	35	2	4	1	9	2	0	0	1	0	0	1	0	1	0	2	0	0	0	1	0	0	0	1	58	156	83	3	3	2	5	5	3	1	1	1	1	0	0	0	0	0	5	5	5	5	5	0	0
214	40	2	2	2	16	3	1	0	1	1	1	2	2	2	1	3	1	0	2	1	0	1	2	1	73	158	100	4	4	5	7	1	1	6	6	6	3	0	0	0	0	0	6	6	6	6	6	0	0
215	37	2	0	1	5	2	1	0	0	0	0	1	1	1	0	2	0	0	0	1	0	0	0	0	58	160	83	2	1	2	2	4	3	3	3	3	4	4	4	4	4	4	4	4	4	4	4	1	1
216	27	2	2	1	12	2	0	0	0	1	0	1	0	1	0	2	0	0	1	1	0	1	1	1	58	150	84	3	3	3	5	4	2	4	4	4	1	4	4	4	4	4	6	6	6	6	6	0	0
217	31	2	2	1	18	4	1	1	1	1	1	1	1	1	1	2	1	0	0	1	0	1	1	1	61	164	84	3	2	4	3	2	1	4	4	4	3	4	4	4	4	4	6	6	6	6	6	0	1
218	34	1	0	2	14	2	1	0	1	1	0	1	1	1	1	1	1	0	0	1	0	0	0	1	60	161	82	3	3	3	4	4	3	5	5	5	1	#NULL!	#NULL!	#NULL!	#NULL!	#NULL!	6	6	6	6	6	1	1
219	31	2	2	1	16	3	1	0	1	1	1	1	0	1	1	2	1	0	0	1	0	0	1	1	69	162	90	4	4	3	4	3	2	6	6	6	1	0	0	0	0	0	4	4	4	4	4	1	1
220	44	2	1	1	12	3	1	1	1	1	1	1	1	1	2	3	1	0	0	1	0	1	1	1	70	154	100	1	2	4	6	4	2	3	3	3	3	4	3	6	6	6	6	6	6	6	6	0	0
221	44	2	3	1	5	2	0	0	0	1	1	1	1	1	0	2	1	0	0	1	0	0	1	1	103	154	120	1	2	2	9	5	1	6	6	6	1	0	0	0	0	0	6	6	6	6	6	0	0
222	32	2	1	1	8	3	1	0	1	1	0	1	0	0	0	1	0	0	0	0	0	0	0	1	51	154	80	3	3	4	4	4	3	3	3	3	3	4	4	4	4	4	4	4	4	4	4	0	1
223	25	2	2	1	16	3	1	0	1	1	0	1	1	1	0	1	1	0	0	1	0	0	1	1	60	160	77	3	1	3	4	5	2	3	3	3	6	4	3	0	0	0	6	2	1	0	3	1	1
224	37	2	2	15	5	3	1	0	1	1	0	0	1	1	1	2	0	0	0	1	0	0	1	1	62	159	86	2	3	3	5	4	3	4	4	4	3	4	4	4	4	4	6	6	6	6	6	1	0
225	37	2	2	1	12	2	1	0	0	1	0	1	0	0	0	2	0	0	0	1	0	0	0	1	66	156	101	2	2	4	5	4	1	6	6	6	1	0	0	4	4	4	6	6	6	6	6	0	1
226	48	2	1	1	16	3	1	0	1	0	0	1	1	1	0	2	0	0	0	1	0	0	1	1	95	167	115	2	1	1	8	5	1	6	6	6	1	0	0	6	6	6	0	0	0	6	6	0	1
227	31	2	3	1	8	3	0	0	1	1	1	1	0	0	0	2	0	0	0	1	0	0	0	1	61	157	90	3	3	2	5	4	1	5	4	0	1	3	4	4	4	4	4	4	4	4	4	0	1
228	41	2	3	1	5	4	1	0	0	1	0	1	1	1	1	3	0	1	0	1	0	0	1	1	86	153	103	2	3	4	7	4	1	4	4	3	1	#NULL!	#NULL!	#NULL!	#NULL!	#NULL!	6	6	6	6	6	0	1
229	26	2	4	1	4	3	0	0	0	1	0	1	0	1	1	3	0	0	0	1	1	0	1	1	92	160	113	2	3	2	5	1	1	6	6	6	1	0	0	4	4	4	6	6	6	6	6	0	1
230	22	2	1	1	14	2	1	0	1	1	0	1	0	0	0	2	0	0	0	1	0	0	0	1	71	150	100	3	3	2	6	2	1	6	6	5	1	0	0	0	4	0	6	6	6	5	6	0	1
231	26	2	2	5	16	3	1	1	1	1	1	1	1	1	1	2	0	1	1	1	0	0	1	1	75	159	95	3	4	4	5	4	1	6	6	6	1	4	4	4	4	4	6	6	6	6	6	0	1
232	30	2	2	1	12	4	1	0	0	1	1	1	1	1	1	3	0	0	0	1	0	1	1	2	70	170	86	3	3	2	4	4	1	5	3	6	1	5	5	5	4	4	6	6	6	6	6	0	1
233	30	2	1	1	16	2	1	0	1	1	1	1	1	1	1	3	1	0	0	1	0	1	2	1	69	164	93	3	3	1	6	4	1	6	6	6	1	4	4	4	6	6	6	6	6	6	6	0	1
234	40	2	2	1	2	2	1	0	0	1	0	1	1	1	1	2	0	0	0	0	0	0	1	1	70	153	100	3	3	1	8	5	1	6	6	6	1	#NULL!	#NULL!	#NULL!	#NULL!	#NULL!	3	#NULL!	4	4	4	0	1
235	32	2	1	1	16	3	1	0	0	0	1	1	0	1	0	2	0	0	0	1	0	0	1	1	60	163	75	2	2	4	4	4	3	3	3	6	3	4	4	4	6	4	6	6	6	6	6	0	1
236	41	2	3	7	19	4	1	0	1	1	1	1	1	1	0	2	1	0	1	1	0	1	3	1	71	162	105	3	3	3	5	4	1	4	4	4	1	4	4	4	4	4	6	6	6	6	6	0	1
237	30	2	2	1	5	2	0	0	0	1	0	1	1	1	1	1	0	0	1	1	0	1	1	1	70	160	92	2	2	3	4	4	2	5	3	3	1	3	4	4	1	4	5	5	4	3	4	1	1
238	36	2	1	1	14	4	1	0	1	1	1	1	0	1	1	2	1	0	1	1	0	0	1	1	116	175	110	3	3	3	6	4	1	5	5	5	1	2	4	5	6	6	6	6	6	6	6	0	1
239	37	2	2	1	12	1	0	1	1	0	0	1	0	0	0	3	1	0	1	1	0	0	0	1	90	155	105	3	3	4	7	4	1	6	6	6	1	0	0	6	6	6	6	6	6	6	6	0	1
240	42	2	2	2	18	9	1	1	1	2	1	1	1	1	0	5	0	1	1	1	0	1	2	1	65	162	95	5	4	5	4	4	5	4	4	6	1	2	6	6	5	6	6	6	6	6	6	0	1
241	18	2	1	1	10	1	0	0	0	0	0	1	0	0	0	0	0	0	0	1	0	0	0	1	54	161	78	3	3	3	3	4	3	3	4	0	4	0	0	0	0	0	3	3	4	0	0	0	1
242	49	2	3	1	11	3	1	0	0	1	1	1	0	1	0	3	0	0	0	1	0	0	1	1	70	161	90	3	4	4	7	4	0	6	1	6	1	2	2	6	6	6	6	6	6	6	6	0	1
243	39	2	3	1	7	2	0	0	0	1	0	1	0	1	1	1	0	0	0	0	0	0	#NULL!	1	60	160	84	3	1	2	4	4	3	1	4	4	4	4	0	0	0	0	4	4	4	4	4	1	0
244	30	2	3	1	12	3	1	0	1	1	0	1	0	1	1	2	0	0	0	1	0	0	1	1	78	162	99	2	1	4	7	5	1	6	1	3	1	3	3	3	3	3	4	4	6	4	4	1	1
245	37	2	2	2	14	6	1	1	1	1	1	2	1	2	1	3	1	0	1	2	1	1	2	1	69	165	90	2	2	3	4	3	3	4	1	6	1	4	3	6	6	6	6	6	6	6	6	0	1
246	30	1	0	10	16	2	0	0	1	1	0	1	0	1	1	2	0	0	0	1	0	0	0	1	68	140	110	3	3	5	7	4	1	6	1	3	1	0	0	0	0	0	6	6	6	6	6	0	1
247	46	2	3	1	5	2	0	0	1	1	1	1	0	1	1	3	0	0	0	1	0	0	1	0	75	162	98	3	3	5	5	3	1	6	1	4	1	4	4	0	0	0	6	6	6	6	6	0	1
249	36	2	3	1	18	3	1	1	1	1	1	1	1	1	1	4	1	1	0	1	1	0	1	1	74	165	94	4	4	3	4	3	1	4	3	4	3	4	4	4	4	4	6	6	6	6	6	0	1
250	27	2	3	1	12	3	0	0	1	1	1	1	1	1	1	2	0	0	1	1	0	0	1	1	75	163	96	3	2	4	6	5	1	6	6	6	1	1	1	6	6	6	6	6	6	6	6	0	1
251	31	2	0	1	18	4	1	1	1	1	1	1	1	1	1	2	0	1	0	1	1	0	1	1	59	157	85	5	3	3	5	4	1	6	6	6	1	4	4	6	6	6	6	6	6	6	6	0	1
252	27	2	1	1	11	3	1	1	1	1	1	1	1	1	1	2	0	0	0	1	0	0	1	1	60	157	85	3	2	2	4	3	1	5	5	5	3	4	4	4	4	4	6	6	4	4	4	0	1
253	31	2	2	12	16	2	1	0	1	0	0	2	0	1	1	2	1	0	0	1	0	0	1	1	91	160	106	5	3	2	5	4	1	6	6	6	1	1	1	6	6	6	6	6	6	6	6	0	1
254	40	2	2	2	16	3	1	0	1	1	1	2	2	2	1	3	1	0	2	1	0	1	2	1	73	158	100	4	4	5	7	1	1	6	6	6	3	0	0	0	0	0	6	6	6	6	6	0	0
254	44	2	1	1	5	1	0	0	0	0	0	1	0	0	0	2	0	0	0	1	0	0	0	1	59	154	86	3	3	2	7	5	1	4	4	4	1	4	4	4	4	4	6	5	6	6	6	1	1
255	36	2	3	12	12	1	0	0	0	1	0	1	1	0	0	1	0	0	0	1	0	0	1	1	73	166	102	3	1	2	5	4	1	4	4	5	1	3	3	4	4	4	4	4	4	4	4	0	1
256	36	2	0	1	2	1	0	0	0	0	0	1	0	0	0	2	0	0	0	1	0	0	1	1	74	158	103	3	3	2	5	2	1	6	6	6	1	3	3	6	6	6	5	5	5	5	5	0	1
257	30	2	1	1	12	3	1	0	1	1	1	1	0	1	1	2	0	0	0	1	0	0	1	1	80	159	105	2	3	3	7	5	1	4	4	0	1	2	2	4	4	4	6	6	6	6	6	0	1
258	40	2	2	1	5	1	0	0	0	0	0	1	1	0	0	1	0	0	0	0	0	0	0	0	82	159	112	2	3	1	8	5	1	6	6	6	1	0	0	0	0	0	4	4	4	4	4	0	1
259	36	2	2	1	8	3	1	0	0	1	0	1	1	0	1	2	0	0	0	1	0	0	0	1	68	160	103	2	1	3	6	4	1	4	4	4	1	3	3	4	4	4	6	6	6	6	6	0	1
260	32	2	2	1	12	2	0	0	0	1	0	1	0	0	0	1	0	0	0	0	0	0	0	1	82	163	108	4	4	4	7	5	1	6	6	6	1	4	4	4	4	4	6	6	6	6	6	0	1
261	44	2	3	3	14	3	1	1	1	1	1	1	1	1	1	3	1	1	0	1	0	0	1	1	86	163	104	3	3	3	5	4	1	6	6	6	1	4	4	4	4	4	6	6	6	6	6	0	1
262	33	2	0	10	11	1	1	0	0	0	0	1	1	0	1	2	0	0	0	1	0	0	0	1	75	156	100	2	3	4	6	4	1	6	6	6	1	3	3	4	4	4	6	6	6	6	6	0	1
263	48	2	3	3	12	3	1	0	0	1	1	1	1	1	1	5	1	0	0	1	0	0	1	1	72	162	90	3	3	4	5	5	1	4	0	4	1	0	0	6	6	6	6	6	6	6	6	0	1
264	37	2	3	12	12	3	1	0	0	1	0	1	1	1	1	2	0	0	0	1	0	0	0	0	68	158	81	3	3	2	7	4	1	6	6	6	1	0	0	0	0	0	6	6	6	6	6	0	1
265	42	2	3	12	5	4	1	0	0	1	1	1	0	0	0	2	0	0	0	0	0	0	1	1	82	159	113	4	3	5	6	4	1	6	6	6	1	4	4	4	4	4	6	6	6	6	6	0	1
266	35	2	2	1	12	3	1	0	1	1	0	1	0	1	0	2	0	0	0	1	0	0	1	1	56	160	80	3	3	3	3	4	1	4	4	3	4	3	3	3	3	3	6	6	4	4	4	0	1
267	31	2	2	1	16	3	1	0	1	1	0	1	0	1	0	2	0	1	0	1	0	0	1	1	71	158	98	3	3	4	6	4	1	6	6	6	1	0	0	6	6	6	4	4	4	6	6	0	1
268	30	2	1	1	12	3	1	0	1	0	0	1	1	1	0	2	0	0	1	1	0	0	1	1	89	166	105	3	3	5	4	3	1	6	6	6	1	3	3	6	6	6	6	6	6	6	6	0	1
269	38	2	3	1	6	3	0	0	0	1	0	1	0	1	0	2	0	0	0	1	0	0	0	1	85	160	90	1	1	1	5	3	1	6	6	6	1	2	2	4	2	4	5	4	4	4	4	0	0
270	40	2	2	3	16	3	1	1	1	1	1	1	1	1	1	2	0	1	1	1	0	0	1	1	54	158	87	3	3	3	3	3	3	3	3	3	1	4	4	0	0	0	6	6	6	0	0	0	1
271	36	2	2	1	16	3	1	0	1	1	0	1	1	1	1	3	0	0	1	1	0	0	1	1	74	160	99	3	3	3	6	4	1	6	6	6	1	3	3	6	6	6	6	6	6	6	6	0	1
272	34	2	1	1	18	0	0	0	0	0	1	1	0	0	0	2	1	0	1	1	0	0	1	1	74	158	99	2	1	1	6	4	1	6	6	6	1	0	0	0	0	0	4	4	4	4	4	0	1
273	36	2	2	1	12	5	1	0	0	1	0	1	0	0	1	2	0	0	0	1	0	0	0	1	68	152	97	2	3	2	6	4	1	6	6	6	1	3	3	4	4	4	6	6	6	6	6	0	1
274	46	2	4	1	12	3	0	0	0	1	0	1	0	1	1	2	0	0	1	0	0	0	1	1	77	158	108	2	3	3	6	5	1	6	6	6	1	4	4	4	4	4	6	6	6	6	6	0	1
275	39	2	3	1	12	3	0	0	1	1	1	1	1	1	1	3	3	0	1	1	0	0	1	1	76	167	100	3	3	4	6	4	1	6	6	6	1	3	3	6	6	6	6	6	6	6	6	0	1
276	41	2	2	1	12	5	1	1	1	2	1	1	0	1	2	2	1	0	0	1	0	0	1	1	64	155	94	3	3	2	5	4	1	6	6	6	1	4	4	4	4	4	6	6	6	6	6	0	1
277	31	2	0	2	16	3	1	0	1	1	1	1	1	1	0	2	0	1	0	1	0	1	1	1	88	154	105	3	3	4	6	4	1	6	6	6	1	4	4	6	6	6	6	5	6	6	6	0	1
278	31	2	2	1	12	3	1	0	0	0	0	1	0	0	0	2	0	0	0	1	0	0	0	1	85	153	105	3	1	3	6	3	1	6	6	6	1	0	0	4	4	4	6	6	6	6	6	0	1
279	49	2	3	1	7	3	1	0	0	1	1	1	0	1	1	3	0	0	1	0	0	1	1	1	62	164	90	3	3	2	3	3	3	3	3	4	1	0	0	0	0	0	6	6	6	6	6	0	1
280	44	2	3	3	18	8	1	1	0	2	1	1	1	1	1	2	1	0	1	1	1	1	1	1	67	157	96	3	3	3	7	4	1	6	6	6	1	3	3	6	6	6	6	6	6	6	6	0	1
281	37	1	0	1	16	3	1	0	1	1	0	1	1	1	1	5	0	1	0	0	0	0	1	1	89	166	104	3	2	5	3	5	1	6	6	4	1	#NULL!	#NULL!	#NULL!	#NULL!	#NULL!	6	6	6	6	6	0	1
282	36	2	4	1	4	3	0	0	0	1	0	1	0	1	0	2	0	0	0	1	0	0	0	1	40	146	69	5	3	5	1	1	3	3	3	3	3	4	4	4	4	4	6	6	6	6	6	0	1
283	34	2	2	1	12	3	1	0	0	1	0	1	1	1	0	2	0	0	0	1	0	0	1	1	75	158	94	3	3	2	7	5	1	6	6	6	1	1	1	6	6	6	6	6	6	6	6	0	1
284	36	1	0	1	12	3	1	1	1	1	0	1	1	1	1	1	0	1	0	1	0	0	1	1	84	162	107	1	2	3	7	5	1	6	6	6	1	#NULL!	#NULL!	#NULL!	#NULL!	#NULL!	6	6	6	6	6	1	0
285	41	2	2	3	16	4	1	1	1	1	1	1	1	1	1	2	1	1	0	1	0	0	3	1	105	170	114	3	3	5	6	4	1	6	6	6	1	5	3	6	6	6	6	6	6	6	6	0	0
286	43	2	5	1	3	2	0	0	0	1	0	1	0	0	1	0	0	0	0	0	0	0	0	1	87	157	113	1	2	2	7	5	1	4	4	4	1	#NULL!	#NULL!	#NULL!	#NULL!	#NULL!	6	6	6	6	6	0	1
287	45	2	3	3	16	4	1	0	1	1	1	1	1	1	1	2	1	0	1	1	0	0	2	1	69	158	99	4	3	3	5	4	1	4	4	4	1	0	0	0	4	0	4	4	4	4	4	0	1
288	31	2	3	14	5	2	0	0	0	1	1	1	1	1	1	1	0	0	0	1	0	0	1	1	77	161	112	2	3	2	6	4	1	4	4	4	1	2	2	1	1	1	6	6	6	1	3	1	0
289	49	2	1	1	12	3	1	0	1	1	1	2	1	2	2	2	1	0	0	1	0	1	2	1	80	161	116	2	2	3	6	5	1	4	4	4	1	0	0	0	0	0	6	6	6	6	6	0	1
290	31	2	2	1	8	2	0	0	0	1	0	1	0	0	1	2	0	0	0	0	0	0	0	0	67	163	89	2	3	2	4	3	2	4	4	4	3	0	0	0	3	0	4	4	4	4	4	1	1
291	26	2	1	1	16	2	1	0	0	0	0	1	1	1	0	2	0	1	0	1	0	1	0	1	85	155	113	2	1	1	5	4	6	6	6	6	1	1	1	1	6	6	6	6	6	6	6	1	0
292	30	2	2	1	16	3	1	0	1	1	1	1	1	1	1	2	0	0	0	1	0	0	1	1	69	160	93	3	3	3	5	4	1	4	4	4	1	0	0	0	4	0	6	6	6	6	6	0	1
293	41	2	2	1	12	3	1	0	0	1	1	1	1	0	0	3	0	1	1	1	0	1	1	1	72	166	98	3	3	3	5	6	3	3	4	3	3	4	4	4	4	4	4	4	4	4	4	0	1
294	33	2	2	1	12	3	1	0	0	0	1	1	0	1	1	2	0	0	0	1	0	0	1	1	90	164	104	2	3	3	7	4	1	6	6	6	1	0	0	0	4	4	6	6	6	6	6	0	1
295	35	2	3	1	6	1	0	0	0	1	1	1	0	1	1	2	0	0	0	0	0	0	0	0	78	162	90	3	3	4	6	4	2	6	6	6	1	3	3	4	4	4	6	6	6	6	6	0	1
296	24	2	3	1	8	3	1	0	0	1	0	1	0	1	0	2	0	0	0	1	0	0	0	1	64	168	87	3	3	4	3	3	3	3	3	3	3	4	4	0	0	0	6	6	6	6	6	0	0
297	27	2	1	1	16	3	1	0	1	1	1	1	1	1	0	2	0	0	0	1	0	0	0	1	58	154	88	3	2	4	4	3	3	3	3	3	3	3	3	0	0	0	6	6	6	6	6	0	1
298	27	2	1	4	16	2	1	0	0	1	0	1	1	1	1	2	0	0	1	1	0	0	0	1	88	170	90	3	3	3	6	4	1	4	4	4	1	3	3	4	4	4	6	6	6	6	4	1	1
299	49	2	1	1	4	2	1	0	0	1	0	1	0	1	1	1	0	0	1	1	0	0	0	1	56	151	85	2	3	2	4	4	3	0	0	0	0	0	0	0	0	0	6	6	6	6	6	0	0
300	24	2	2	1	12	2	0	0	1	0	0	1	0	1	1	1	0	0	0	1	0	0	1	1	92	174	97	3	3	3	6	4	1	6	6	6	1	2	2	4	4	4	6	6	6	6	6	0	1
301	44	2	2	1	12	2	0	0	1	1	0	1	0	1	1	1	1	0	0	1	0	0	0	1	72	151	107	1	1	1	7	4	1	6	6	6	1	3	3	4	4	4	6	6	6	6	6	1	1
302	25	2	2	1	16	2	0	0	1	1	0	1	0	1	1	2	1	0	0	1	0	1	1	1	70	161	93	2	3	2	5	4	1	4	4	4	1	3	4	4	4	4	6	6	6	6	6	1	1
303	40	2	2	1	12	2	0	0	0	1	0	1	1	1	0	2	0	0	0	0	0	0	1	0	73	164	95	1	3	2	6	4	3	6	6	6	1	0	0	0	0	0	4	4	4	4	4	0	1
304	24	2	1	1	16	2	1	0	1	1	0	1	1	1	0	2	0	1	0	1	0	1	1	1	72	161	95	3	4	3	5	4	1	0	0	0	3	0	0	0	0	0	4	3	3	3	3	1	1
305	19	2	2	1	9	2	0	1	1	0	1	1	0	1	0	2	1	0	0	1	0	1	0	1	56	150	91	2	3	3	5	5	4	0	0	0	0	4	4	0	0	0	5	5	5	4	4	0	1
306	42	2	3	1	5	3	0	0	0	1	0	1	0	1	1	1	0	0	0	0	0	0	1	1	98	158	120	2	1	1	9	3	1	6	6	6	1	3	3	4	4	4	4	4	4	4	4	1	0
307	40	2	3	3	16	3	1	1	1	1	1	1	1	1	1	2	1	0	1	1	0	1	1	1	69	159	90	4	3	2	4	3	3	3	3	3	3	4	4	4	4	4	4	4	4	4	4	0	0
308	30	2	2	1	5	1	0	0	0	0	0	1	0	1	0	2	0	0	0	0	0	0	1	0	90	162	113	5	3	2	7	1	1	6	6	6	1	0	0	4	4	4	6	6	6	6	6	0	0
309	28	2	2	1	12	2	0	0	0	0	0	1	0	1	0	2	0	0	0	0	0	0	0	1	58	158	90	2	3	3	5	5	5	3	3	3	3	0	0	0	0	0	4	4	4	4	4	0	1
310	40	2	3	1	12	6	1	1	1	2	2	2	2	2	1	3	1	1	2	2	2	2	2	2	68	163	93	5	2	5	5	4	3	0	0	0	0	4	4	4	4	4	6	6	6	6	6	0	0
311	24	2	0	3	16	3	0	1	1	1	0	1	1	1	1	1	0	2	1	1	0	0	1	1	80	158	100	3	4	3	6	4	1	6	6	6	1	6	5	0	0	0	6	5	6	6	6	0	1
312	36	2	2	12	12	3	1	0	1	1	0	1	0	1	1	2	1	0	0	1	0	0	1	1	62	162	89	3	3	4	4	3	2	4	4	4	3	0	0	0	0	0	4	4	4	4	4	0	1
313	49	2	4	1	12	2	1	0	1	0	0	1	1	1	1	1	0	0	0	1	0	0	1	1	61	160	87	4	3	3	2	2	5	6	6	6	1	6	6	6	6	6	6	6	6	6	6	0	0
314	31	2	2	3	18	3	1	1	1	3	1	1	0	1	1	2	0	1	0	1	0	1	1	1	68	163	90	5	2	5	4	4	1	4	4	4	3	3	3	6	6	6	6	6	6	6	6	0	1
315	39	2	2	1	12	3	1	0	1	0	1	1	1	1	0	3	0	0	1	0	0	0	1	1	59	159	85	3	3	3	6	5	3	0	0	0	1	3	4	4	4	4	4	4	4	4	4	0	0
316	33	2	1	1	12	3	1	0	1	1	1	1	1	2	1	2	0	1	0	1	0	0	1	1	98	162	107	3	3	3	5	5	1	6	6	6	1	4	2	0	0	0	6	6	6	6	6	0	0
317	36	2	2	1	5	1	1	0	0	0	0	1	0	0	0	2	0	0	0	0	0	0	0	1	95	165	120	2	2	3	8	5	1	6	6	6	1	3	3	4	4	4	6	6	6	6	6	1	1
318	43	2	1	1	9	3	1	0	1	1	0	1	1	1	1	2	0	0	0	1	0	0	1	1	54	160	83	2	3	4	4	4	6	4	4	4	3	3	3	0	0	0	6	6	6	4	4	1	0
319	33	2	1	1	12	9	1	0	1	1	1	1	1	2	1	1	0	0	1	1	0	1	1	1	87	163	99	3	3	3	7	6	1	6	6	6	1	1	1	6	6	6	6	6	6	6	6	0	0
320	25	2	1	1	12	4	1	0	1	0	0	1	1	1	0	1	0	0	0	1	0	0	0	1	68	155	96	5	3	5	5	3	3	3	3	3	3	4	4	0	0	0	5	5	5	5	5	0	1
321	33	2	2	3	12	3	1	1	1	1	1	1	1	1	1	3	0	1	1	1	0	0	1	1	70	166	92	3	3	4	5	4	3	6	6	6	1	6	6	4	4	4	6	6	6	6	6	0	1
322	4	1	0	2	16	5	1	1	1	2	1	1	1	2	1	4	1	1	0	1	0	0	1	1	67	161	92	3	2	5	5	4	2	6	6	6	1	#NULL!	#NULL!	#NULL!	#NULL!	#NULL!	4	5	6	6	6	0	1
323	49	2	4	1	5	3	1	1	0	1	0	1	0	1	1	4	0	1	0	1	0	0	1	1	75	160	100	3	3	3	6	6	1	4	4	4	1	4	4	4	4	4	4	4	4	4	4	0	1
324	30	2	2	1	12	3	1	1	1	1	1	1	1	1	1	1	0	0	0	1	0	0	1	1	73	160	94	3	1	3	4	4	2	4	4	4	3	4	4	0	0	0	6	6	6	6	6	1	0
325	25	2	1	1	12	2	0	0	0	0	0	1	0	1	0	2	0	0	0	0	0	0	1	0	53	156	74	3	2	3	2	5	1	6	6	1	6	1	1	1	3	3	3	4	4	3	3	1	1
326	36	2	2	1	16	3	0	0	0	0	0	1	1	1	0	2	0	0	0	1	0	0	1	1	100	164	116	2	3	4	7	4	1	4	4	6	1	0	0	0	4	4	6	6	6	6	6	0	1
327	29	2	2	1	5	2	0	0	1	1	0	1	0	0	1	2	0	0	0	1	0	0	1	1	71	159	99	2	1	2	5	3	1	6	6	6	1	3	3	4	6	6	5	5	6	6	6	0	1
328	32	2	2	1	12	3	0	0	1	1	1	1	0	1	1	2	0	0	1	1	0	0	1	1	67	149	95	3	3	3	7	4	1	6	6	6	1	0	0	0	0	0	4	4	6	6	6	0	1
329	29	2	2	1	5	3	0	0	1	1	0	1	1	1	1	2	0	0	0	0	0	0	1	1	71	159	85	3	3	4	5	3	2	4	4	4	1	3	4	4	4	4	6	6	6	6	6	0	1
330	25	2	1	1	7	2	0	0	0	0	0	1	0	1	0	2	0	0	1	0	0	0	0	1	58	156	96	3	3	3	5	5	4	3	3	3	3	4	4	4	4	4	6	6	5	6	6	0	1
331	43	2	0	1	12	2	1	1	1	1	0	2	0	1	1	3	1	0	0	1	0	0	1	1	92	155	116	2	2	3	7	5	1	4	4	4	1	3	3	4	4	4	6	6	6	4	4	0	1
332	35	2	3	1	12	2	0	0	0	0	1	1	0	0	1	2	0	0	1	1	0	0	0	1	68	156	102	3	3	2	7	5	1	6	6	6	1	2	2	4	4	4	6	5	6	6	6	0	1
333	48	2	2	3	14	3	1	0	1	1	1	1	0	0	1	3	0	0	0	1	0	0	1	0	108	176	114	3	3	3	6	2	1	6	6	6	1	0	0	0	0	0	6	6	6	6	6	0	1
334	35	1	0	1	12	4	0	0	0	1	1	1	1	1	1	3	1	0	0	1	0	0	1	1	79	158	95	4	3	3	7	5	1	6	6	6	1	#NULL!	#NULL!	#NULL!	#NULL!	#NULL!	6	6	6	6	6	0	1
335	39	2	2	1	12	4	1	1	1	1	1	2	1	2	1	4	2	1	1	1	1	1	4	1	70	164	97	4	3	3	5	5	1	6	3	6	1	4	4	4	4	4	6	3	2	6	6	0	1
336	43	2	3	1	12	3	1	0	1	1	1	1	0	1	1	2	1	0	0	1	0	0	1	1	60	154	90	4	4	3	4	4	3	4	4	3	4	2	4	4	4	4	5	5	4	3	3	1	1
337	45	2	3	3	16	6	1	0	1	2	1	1	1	1	1	3	1	0	1	1	1	0	4	1	93	162	102	4	3	3	5	4	1	4	4	3	1	0	0	0	0	0	6	2	4	0	6	0	0
338	43	2	3	3	16	3	1	1	1	1	1	1	1	1	1	2	0	0	0	1	0	1	1	1	82	161	107	1	3	3	7	5	1	6	6	4	1	3	3	4	2	4	6	6	4	4	4	1	1
339	24	2	2	1	9	4	1	0	0	1	1	1	1	0	0	2	0	0	0	0	0	0	1	1	60	160	85	3	3	3	3	2	3	4	4	4	1	2	2	4	3	4	4	4	3	5	4	0	1
340	30	1	0	1	12	3	1	0	0	1	0	1	0	1	1	1	0	0	0	1	0	0	0	1	8	162	100	3	4	3	7	4	1	4	4	4	3	#NULL!	#NULL!	#NULL!	#NULL!	#NULL!	6	6	6	6	6	0	0
341	35	2	3	1	12	2	1	0	1	1	0	1	0	1	0	3	0	0	0	0	0	0	0	0	92	162	107	3	2	4	7	4	1	6	6	6	1	3	3	4	4	4	4	4	4	4	4	0	1
342	32	2	2	1	16	3	1	1	1	1	1	1	1	1	1	2	0	0	0	1	0	0	1	1	52	160	85	3	4	5	4	5	1	1	1	1	6	4	4	4	4	4	6	6	6	6	6	0	1
343	31	2	1	1	12	3	1	1	1	1	1	1	1	1	1	2	0	1	0	1	0	0	1	1	98	165	105	3	1	3	7	5	1	6	6	6	1	0	0	0	0	0	3	3	4	6	0	0	1
344	39	2	1	1	14	2	1	1	1	1	1	1	1	1	1	1	0	0	1	1	0	0	1	1	79	161	95	3	2	2	7	5	1	6	6	6	1	4	3	4	4	4	5	5	5	3	3	1	1
345	25	2	1	1	12	2	1	0	1	0	0	1	1	1	0	2	0	0	0	1	0	1	1	1	61	163	78	3	3	2	4	4	4	4	4	4	4	4	4	4	4	4	6	6	6	6	6	0	1
346	29	2	2	1	12	3	1	1	1	1	1	1	1	1	1	2	1	0	0	1	0	0	1	1	78	163	100	3	2	4	5	4	1	6	6	6	1	5	5	4	4	4	6	6	6	6	6	0	1
347	27	2	1	1	16	2	1	0	1	0	0	1	0	1	1	2	0	1	0	1	0	0	1	1	74	162	94	3	3	2	5	4	1	4	4	4	3	4	4	4	4	4	6	5	6	6	5	0	0
348	27	2	2	1	6	2	0	0	0	0	0	1	1	1	0	2	0	0	0	1	0	0	1	1	87	163	108	5	1	2	6	3	1	6	6	6	1	1	1	4	4	4	6	6	6	6	6	1	1
349	38	2	2	1	5	2	1	0	0	0	1	1	1	1	1	2	0	0	0	1	0	0	0	1	79	154	109	3	3	3	7	3	1	6	6	6	1	1	1	0	0	0	6	6	6	6	6	1	0
350	30	2	2	1	12	3	1	1	1	1	0	1	1	1	1	2	1	0	0	1	0	1	1	1	69	167	89	3	3	2	4	3	3	6	6	6	1	3	3	4	4	4	6	6	6	6	6	0	0
351	33	2	2	10	12	2	0	0	1	1	1	1	0	1	1	2	1	0	1	0	1	0	1	1	76	155	95	2	1	3	6	4	1	4	4	4	3	0	0	0	0	0	3	3	0	4	4	0	0
352	38	2	4	10	5	2	0	0	0	1	0	1	0	1	0	2	0	0	0	1	0	0	0	1	76	162	94	2	1	2	5	3	1	6	6	6	1	4	4	4	4	4	4	4	4	4	4	0	0
353	46	2	2	3	16	4	1	1	1	1	1	1	1	1	1	4	1	1	1	1	0	1	4	1	74	159	99	3	3	3	6	4	1	6	6	6	1	0	0	0	0	0	6	6	6	6	6	0	0
354	32	1	0	1	12	3	0	0	0	0	1	1	1	1	1	2	0	0	0	1	0	0	0	0	70	160	95	3	3	2	4	4	3	1	1	1	4	5	3	4	4	4	6	6	3	4	4	1	0
355	32	2	3	1	8	2	0	0	0	1	0	1	1	1	1	3	0	0	0	1	0	0	0	1	61	161	87	3	2	2	5	5	3	1	1	1	1	4	4	4	4	4	4	4	4	4	4	1	0
356	46	2	1	14	8	2	1	0	1	1	0	1	0	1	1	4	0	0	0	1	0	0	1	1	87	161	107	3	2	3	6	4	1	6	6	6	1	3	3	0	0	0	6	6	6	6	6	0	0
357	28	2	0	3	16	2	1	1	1	1	1	1	1	1	1	1	0	1	1	1	0	0	0	1	85	165	120	2	1	3	7	4	1	6	6	6	1	6	6	6	6	6	6	6	6	6	6	0	1
358	38	2	3	1	5	3	0	0	0	0	0	1	0	1	0	2	0	0	0	1	0	0	0	1	62	154	93	3	4	2	6	1	2	4	4	4	3	4	4	0	0	0	4	4	4	4	4	0	1
359	41	2	2	1	12	2	0	0	0	0	0	1	0	1	1	2	0	0	0	1	0	0	0	1	60	153	96	3	2	2	4	3	3	4	4	4	3	0	0	0	0	0	4	4	4	4	4	0	1
360	40	2	2	1	12	3	1	0	1	1	1	1	1	1	1	1	1	0	0	1	0	0	1	1	68	158	92	3	3	2	5	4	3	3	3	6	1	4	4	4	4	4	6	6	6	6	6	0	1
361	38	2	1	1	12	3	1	0	1	1	0	1	0	1	1	3	1	0	0	1	0	0	0	1	86	165	111	2	2	4	6	4	1	4	4	3	4	4	4	4	4	4	4	4	4	4	4	0	1
362	36	2	3	1	5	3	0	0	0	0	0	1	0	1	1	2	1	1	1	1	0	0	0	1	91	156	114	2	1	2	7	5	1	6	6	6	6	4	4	4	4	4	4	3	4	4	4	0	1
363	19	2	0	1	12	3	1	0	0	1	0	1	0	1	0	3	0	0	0	1	0	1	0	1	64	158	86	4	2	5	5	4	3	6	6	6	3	6	6	6	0	6	6	6	6	4	6	1	0
364	40	2	2	2	18	4	1	1	1	1	1	1	1	1	1	4	1	1	1	1	0	0	1	1	56	161	77	3	3	5	4	5	3	4	3	6	1	4	4	0	0	0	6	6	6	6	6	0	0
365	47	2	1	5	16	3	1	0	1	1	0	1	1	1	1	3	1	0	1	1	0	0	1	1	68	150	90	3	2	2	5	2	2	6	6	6	1	0	0	0	0	0	6	6	6	6	6	0	1
366	46	2	3	12	8	30	0	0	0	1	1	1	0	1	1	2	1	0	0	1	0	0	1	1	78	157	120	3	1	3	9	3	1	6	6	6	1	5	5	4	6	6	6	6	6	6	6	0	0
367	28	2	1	2	16	3	1	0	0	0	1	1	1	1	0	2	0	1	1	1	0	0	1	1	67	161	78	3	3	3	4	3	2	6	5	6	1	5	5	5	5	5	6	6	6	6	6	0	1
368	36	2	2	2	16	6	1	0	1	2	1	1	1	2	0	3	0	1	0	1	1	1	4	1	90	155	115	1	2	4	8	5	1	6	6	5	1	5	3	6	5	3	3	3	6	4	4	0	0
369	48	2	2	2	16	3	1	1	1	1	1	1	1	1	1	4	1	0	0	1	1	0	1	1	100	158	120	3	1	1	7	4	1	6	6	6	3	6	5	3	3	3	6	4	4	6	6	0	1
370	28	2	3	1	12	3	1	0	1	1	0	1	1	0	0	3	0	0	0	0	0	0	1	1	73	160	90	3	3	5	5	4	1	6	6	6	1	4	4	4	4	4	6	6	6	6	6	0	1
371	34	2	2	1	18	4	1	1	1	1	1	1	0	0	1	2	1	0	0	2	1	0	2	1	76	155	93	4	3	4	7	5	1	6	6	6	1	2	2	4	6	6	6	6	6	6	6	0	1
372	27	2	1	15	16	3	1	0	1	1	0	1	1	1	1	2	0	1	0	1	0	1	1	1	59	156	85	2	2	2	5	4	1	6	6	6	1	4	4	4	4	4	6	6	6	6	6	0	1
373	42	2	4	1	14	4	1	1	1	1	1	1	1	2	1	4	1	1	1	1	1	1	1	1	76	160	110	3	3	3	6	5	1	5	5	6	1	4	4	4	6	4	6	6	6	6	6	0	1
374	41	2	3	1	8	3	1	0	1	1	0	1	0	1	1	3	0	0	0	1	0	0	0	1	83	153	105	2	3	2	7	5	6	6	6	1	1	0	0	0	4	4	3	5	3	6	6	1	1
375	35	2	2	1	16	3	1	0	1	1	0	1	1	1	1	2	1	0	0	1	0	1	1	1	63	150	91	3	3	3	6	4	1	6	6	6	1	3	3	6	6	6	6	6	6	6	6	0	1
376	30	2	2	2	16	1	0	1	1	0	1	1	1	1	0	3	0	1	0	1	0	0	1	1	63	150	91	2	3	4	5	3	1	6	6	6	1	2	2	4	4	4	6	6	6	6	6	0	1
377	36	2	2	1	5	2	1	0	0	1	0	1	0	0	0	2	0	0	0	1	0	0	0	0	49	155	79	3	3	5	4	5	1	6	6	3	6	0	0	0	6	0	6	6	6	6	6	0	1
378	39	2	4	15	12	3	1	0	1	1	1	1	1	1	1	3	1	0	0	1	0	0	1	1	75	154	100	3	3	3	6	5	1	6	6	6	1	0	4	4	4	4	6	6	6	6	6	0	1
379	37	2	2	15	5	3	1	0	1	1	0	1	1	0	0	2	0	0	0	1	0	0	1	0	65	159	87	3	3	3	5	4	1	4	4	4	1	4	4	4	4	4	6	6	6	6	6	0	1
380	28	2	2	1	12	3	1	1	1	1	1	1	0	1	1	2	0	0	1	1	0	0	1	1	67	164	93	3	2	4	5	4	1	4	4	4	1	4	4	4	4	4	6	6	4	4	4	0	1
381	28	2	1	1	14	2	1	0	1	1	0	1	0	1	0	2	0	0	0	1	0	0	1	1	46	157	75	3	3	2	3	4	3	4	4	3	4	2	2	2	2	2	4	4	5	5	5	0	1
382	35	2	2	3	16	3	1	1	1	1	0	1	1	0	0	2	1	0	1	1	0	1	0	1	76	160	105	3	3	2	6	3	1	6	6	6	1	3	4	6	6	6	6	6	6	6	6	0	1
383	24	2	1	1	8	3	1	0	1	1	0	1	0	1	0	2	0	0	0	0	0	0	0	1	112	170	120	3	1	2	8	5	1	6	6	6	1	3	3	6	6	6	6	6	6	6	6	0	1
384	32	2	2	4	18	3	1	1	1	0	1	1	0	1	1	2	1	0	0	1	0	0	1	1	59	156	89	3	3	5	5	4	2	4	4	4	1	2	4	4	4	4	6	6	4	6	6	0	1
385	3	2	2	13	10	3	1	0	1	0	0	1	1	0	1	2	0	0	1	1	0	0	1	1	80	164	102	1	1	2	6	4	1	6	6	6	1	3	3	4	4	4	6	6	6	6	6	0	1
386	31	2	2	1	16	3	1	1	1	1	1	1	1	1	1	2	1	0	1	1	0	1	1	1	64	158	96	3	3	3	5	4	1	5	5	3	1	4	4	3	3	0	4	4	4	0	0	0	1
387	3	2	2	1	8	2	0	0	0	0	0	1	0	0	0	1	0	0	0	1	0	0	0	1	55	156	78	3	3	2	4	4	3	3	3	4	1	#NULL!	#NULL!	#NULL!	#NULL!	#NULL!	6	6	6	6	6	0	1
388	29	2	0	1	12	1	1	0	1	0	0	1	0	1	1	2	0	0	0	1	0	0	1	1	92	158	120	3	4	3	7	4	1	6	6	6	1	0	0	4	4	4	6	6	6	6	6	0	1
389	45	2	2	3	16	4	1	0	1	1	1	1	0	1	1	4	1	1	0	1	0	0	3	1	97	163	113	4	2	2	7	5	1	6	6	6	1	3	3	6	6	6	6	6	6	6	6	0	1
390	28	2	2	12	12	2	0	0	0	1	0	1	1	1	0	2	0	0	0	1	0	1	1	0	67	167	8	4	4	3	4	4	3	4	4	6	1	4	4	4	4	4	6	6	6	6	6	0	0
391	36	2	2	1	6	4	1	0	1	0	0	1	1	1	1	3	0	0	1	1	0	0	1	1	76	172	80	3	4	5	6	3	1	6	6	6	2	6	6	6	6	6	6	6	6	6	6	0	1
392	47	2	4	1	7	3	1	0	1	1	1	1	1	1	1	6	1	1	0	1	0	0	1	1	97	154	113	3	3	5	7	4	1	6	6	6	1	0	0	0	0	0	4	4	4	4	4	0	1
393	38	2	0	1	12	2	1	0	0	0	1	1	1	0	1	3	1	0	1	0	0	0	1	1	96	163	109	2	2	2	7	4	1	6	6	6	1	4	4	4	4	4	6	6	6	6	6	0	1
394	37	1	0	12	8	5	1	1	1	1	1	1	1	0	1	4	1	0	0	1	0	0	0	1	61	162	79	3	3	3	3	3	5	3	4	4	2	#NULL!	#NULL!	#NULL!	#NULL!	#NULL!	4	4	4	4	4	0	1
395	31	2	1	2	16	3	1	1	1	1	1	1	1	1	1	2	0	0	0	1	0	0	1	1	74	161	91	3	2	3	4	3	1	6	6	4	1	2	2	6	6	6	6	6	6	6	6	0	1
396	31	2	1	1	16	2	1	0	0	1	0	1	1	0	1	1	0	0	0	1	0	0	1	1	90	16	98	1	2	4	5	4	1	6	6	6	1	3	3	6	6	6	4	4	4	6	6	0	1
397	29	2	1	2	18	2	1	0	1	0	0	1	1	1	1	2	0	1	1	1	0	0	1	1	79	164	93	3	3	4	5	4	1	6	6	6	1	4	4	4	4	4	6	6	6	6	6	0	1
398	37	2	2	12	12	4	1	1	1	1	1	1	1	1	1	4	1	0	0	1	0	0	1	1	72	174	85	2	3	4	4	4	4	0	0	6	1	6	6	6	6	6	6	6	6	6	6	0	1
399	36	2	1	2	16	4	1	1	1	0	1	1	1	1	1	2	0	1	0	1	0	1	1	1	62	155	75	3	3	2	4	2	1	6	6	6	1	4	4	0	4	4	4	4	4	4	4	0	1
400	43	2	3	1	5	2	0	0	0	1	1	1	1	1	1	4	1	0	0	1	0	0	1	1	94	151	110	3	3	3	7	6	1	6	6	4	1	3	0	4	6	4	4	4	4	4	4	0	0
401	38	2	2	1	8	3	1	0	1	1	1	1	0	1	1	3	1	0	0	1	0	0	1	1	106	164	121	2	1	3	7	5	1	6	6	6	1	0	0	4	4	4	6	3	4	6	6	0	1
402	37	2	3	10	6	3	1	0	1	1	0	1	0	0	0	2	1	0	2	1	0	0	0	1	60	161	87	2	2	2	2	3	5	0	0	4	3	4	4	4	4	4	6	6	6	6	6	0	1
403	45	2	4	1	0	3	0	0	0	1	0	1	0	0	1	5	1	0	0	0	0	0	0	1	89	165	120	3	3	3	6	5	1	6	6	6	1	0	0	4	4	4	4	4	4	4	4	0	0
404	18	2	0	1	16	3	1	0	1	1	0	1	0	0	1	5	0	0	0	1	0	0	0	1	67	155	85	4	3	3	5	4	2	6	6	5	1	5	5	0	4	4	4	4	4	4	4	0	0
405	6	2	2	1	12	3	1	0	1	1	1	1	0	1	1	2	1	0	1	1	0	0	1	1	62	158	90	4	3	4	3	3	5	0	0	0	3	4	4	4	4	4	4	4	4	4	4	0	1
406	31	2	2	1	12	3	1	0	1	0	0	1	1	1	1	4	0	0	1	1	0	0	0	1	96	166	109	3	4	4	7	5	1	7	7	3	1	0	0	0	0	0	4	4	4	4	4	0	1
407	25	2	2	5	16	3	1	1	1	1	1	1	0	1	1	2	1	1	0	1	1	0	1	1	74	160	97	2	1	3	6	4	1	6	6	6	1	3	3	4	4	4	6	6	6	6	6	0	1
408	36	2	2	1	12	3	1	0	1	1	1	1	0	1	0	2	0	0	1	1	0	0	0	1	85	166	105	3	2	2	6	4	1	6	6	6	1	4	3	6	6	6	6	6	6	6	6	0	0
409	38	2	1	1	5	1	0	0	0	1	0	1	0	0	1	3	1	0	0	0	0	0	1	0	52	163	76	3	2	2	2	4	1	6	6	3	6	#NULL!	#NULL!	#NULL!	#NULL!	#NULL!	4	4	4	4	4	0	1
410	33	2	2	1	16	4	1	0	1	1	1	1	1	1	1	2	0	0	0	1	0	1	1	1	92	170	97	4	2	4	6	4	1	6	6	6	1	5	2	6	5	6	6	6	6	6	6	0	1
411	49	2	2	2	12	3	1	1	1	1	1	1	0	3	1	5	2	1	1	1	0	0	1	2	86	162	115	3	2	3	6	3	1	6	6	6	1	0	0	4	4	4	6	6	6	6	6	0	1
412	40	2	2	2	18	6	1	1	1	2	1	2	1	2	1	3	1	1	0	1	0	0	2	1	64	151	95	3	1	3	6	4	2	6	6	4	1	1	1	6	5	6	6	6	6	4	5	1	0
413	25	2	1	1	16	3	1	0	1	1	0	1	0	1	0	2	0	1	0	1	0	1	0	1	46	151	75	2	2	3	3	3	3	3	3	3	3	4	4	0	0	0	4	4	4	0	0	1	1
414	32	2	2	12	12	2	1	0	0	0	0	1	0	1	1	2	1	0	0	0	0	0	0	0	71	157	92	2	3	3	5	5	3	5	3	6	1	0	0	0	0	0	6	6	6	6	6	0	0
415	31	2	1	8	16	6	1	1	1	2	1	1	1	2	1	2	1	0	1	1	1	1	1	1	57	163	80	3	3	2	4	4	4	6	4	6	1	6	5	6	4	6	6	6	6	6	6	0	1
416	48	2	4	1	5	5	1	0	1	1	1	1	0	1	1	3	0	0	0	1	0	0	1	1	66	158	105	3	1	3	6	3	1	6	6	5	1	1	1	6	6	6	6	6	6	6	6	0	1
417	36	2	2	22	18	3	1	1	1	1	0	1	1	1	1	2	1	1	0	1	0	1	1	1	69	160	90	4	3	4	4	3	1	6	6	6	1	0	0	6	6	6	6	6	6	6	6	0	0
419	19	2	1	1	11	1	0	0	1	0	0	1	0	1	0	2	0	0	0	0	0	0	0	0	52	166	75	3	1	2	2	4	1	6	6	1	6	2	2	3	0	0	4	3	6	4	4	0	1
420	35	2	2	1	4	3	1	0	1	1	1	1	0	1	1	2	1	0	0	1	0	0	1	1	75	160	93	2	1	2	5	4	3	4	4	4	1	4	4	4	4	4	4	4	4	4	4	0	1
421	25	2	1	1	12	2	1	0	0	0	1	1	1	0	1	2	0	0	0	1	0	1	1	1	53	155	87	3	4	3	4	4	3	3	3	3	3	4	4	4	4	4	6	4	3	3	3	1	1
422	30	2	1	1	16	3	1	0	0	0	0	1	1	1	0	2	0	1	0	1	0	1	0	1	87	160	111	2	3	2	7	5	1	1	1	1	6	3	3	0	0	0	4	4	4	4	4	0	0
423	43	2	2	2	12	3	1	0	1	1	0	1	1	2	0	4	1	0	0	1	0	1	1	1	77	150	105	4	3	3	6	4	1	4	4	4	1	0	3	4	4	4	4	4	4	4	3	1	1
424	36	2	3	1	12	2	1	1	1	1	1	1	0	1	1	2	0	0	0	1	0	0	0	1	64	158	96	3	2	4	6	4	0	3	3	3	3	4	4	4	4	4	6	4	4	4	4	0	1
425	4	2	3	2	12	2	0	0	0	0	1	1	1	1	0	1	1	0	1	1	0	0	0	1	89	164	109	3	3	2	7	5	1	4	4	4	3	5	3	4	4	4	4	4	4	4	4	0	0
426	25	2	2	1	16	3	1	0	1	1	0	1	0	1	0	2	1	0	0	1	0	0	1	1	60	162	81	3	3	2	4	5	2	3	3	3	4	3	3	2	2	2	4	4	4	4	4	0	0
427	25	2	3	1	12	1	0	0	1	0	0	1	1	1	0	1	0	0	0	0	0	0	0	0	90	163	110	1	2	2	7	4	2	6	6	6	1	0	0	0	0	0	5	5	5	5	5	0	1
428	34	2	2	1	12	2	0	0	0	0	0	1	1	1	1	1	1	0	0	1	0	0	0	1	66	158	90	1	1	2	6	5	6	6	6	1	4	4	4	4	4	4	6	6	6	6	6	0	1
429	30	2	2	1	18	3	1	1	1	1	2	1	0	1	1	3	0	1	1	1	0	1	1	1	54	156	76	2	2	2	4	3	5	4	4	4	1	6	6	4	4	4	6	6	6	6	6	0	1
430	39	1	0	1	16	3	0	0	1	1	1	1	1	1	1	3	1	1	0	1	0	0	2	1	62	164	85	3	3	5	5	4	3	5	5	5	1	#NULL!	#NULL!	#NULL!	#NULL!	#NULL!	4	0	6	5	4	0	1
431	33	1	0	1	12	3	0	0	1	1	0	1	1	1	1	3	1	0	0	1	0	0	1	1	106	164	125	3	3	2	9	5	1	6	6	6	1	#NULL!	#NULL!	#NULL!	#NULL!	#NULL!	6	6	6	6	6	0	0
432	40	1	0	1	16	3	0	0	1	1	1	1	0	1	1	2	1	0	0	1	0	0	1	1	71	161	93	3	3	3	5	4	3	4	4	4	1	#NULL!	#NULL!	#NULL!	#NULL!	#NULL!	4	4	4	4	4	0	0
433	40	2	2	1	12	3	1	0	1	1	0	1	1	1	1	2	0	1	0	0	0	0	1	1	86	172	98	3	3	4	5	4	1	6	6	6	1	4	2	4	4	4	6	6	6	6	6	0	0
434	24	2	1	1	14	3	1	0	0	1	0	1	1	1	1	2	1	1	0	1	0	0	1	1	49	165	66	2	3	3	2	3	1	1	1	1	1	4	4	4	4	4	6	6	6	6	6	0	0
435	28	2	1	1	16	3	1	0	1	1	0	1	1	1	0	2	1	0	0	1	0	0	1	1	65	161	87	3	3	3	2	1	1	5	5	5	1	4	4	4	4	4	4	4	4	4	4	1	1
436	38	2	2	3	14	5	1	0	1	2	0	1	1	1	0	2	0	0	1	1	0	0	1	1	57	158	76	2	2	3	4	4	3	0	0	0	0	0	0	0	0	0	0	0	0	4	4	0	1
437	49	2	2	14	6	3	1	0	0	1	0	1	1	1	1	3	1	1	0	1	0	0	1	1	91	162	110	2	2	2	7	3	1	6	6	6	1	3	3	4	4	4	6	6	6	6	6	1	1
438	40	2	2	2	12	6	1	0	1	1	1	1	0	1	1	3	1	0	1	1	0	0	1	1	57	158	78	3	3	4	4	4	5	1	1	1	1	4	6	4	4	4	4	4	4	4	4	1	1
439	1	2	2	1	12	4	1	0	1	0	0	1	1	1	1	2	1	1	0	0	0	0	0	1	59	154	80	4	3	2	4	4	3	3	3	0	3	0	0	0	0	0	6	6	6	6	6	0	0
440	22	2	1	1	12	3	1	1	1	0	0	1	1	1	0	1	1	1	1	0	0	0	1	1	54	156	83	2	4	2	5	3	3	6	6	6	1	5	4	4	4	4	6	6	6	6	6	0	0
441	34	2	2	1	8	3	1	0	1	1	1	1	0	1	0	2	0	0	1	1	0	0	1	1	56	167	78	1	2	2	3	4	3	1	1	2	1	3	3	0	0	0	6	6	6	6	6	0	0
442	49	2	3	1	1	3	0	0	0	1	0	1	0	1	0	2	0	0	0	0	0	0	0	0	83	161	105	1	2	2	7	6	1	4	4	4	3	0	0	0	0	0	4	4	4	4	4	0	0
443	45	2	2	1	4	2	0	0	0	1	0	1	1	1	0	1	0	0	0	0	0	0	0	1	70	169	96	1	2	3	7	4	1	6	6	6	1	6	1	4	4	4	6	6	6	6	6	0	0
444	9	2	3	3	18	4	1	1	1	1	1	2	1	3	1	3	1	1	0	1	0	0	2	1	69	161	91	4	3	4	4	3	2	6	6	6	1	5	5	4	4	4	6	6	6	6	6	0	0
445	41	2	4	2	2	3	1	0	0	1	0	1	0	1	0	2	0	0	0	0	0	0	0	0	68	161	88	2	4	2	4	4	2	1	1	1	1	4	4	4	4	4	4	4	4	4	4	0	1
446	32	2	3	1	12	2	0	0	1	1	0	1	1	1	1	2	1	0	0	1	0	0	1	1	74	160	99	3	1	2	4	3	1	6	6	6	1	0	0	0	0	0	4	4	4	4	4	1	0
447	41	2	3	1	5	3	1	1	0	1	1	1	1	1	1	3	0	1	0	1	0	0	1	1	80	155	115	1	2	3	8	3	1	6	6	6	1	0	3	4	4	4	4	4	4	4	4	1	1
448	32	2	3	1	12	8	1	0	1	4	1	1	1	1	1	2	0	0	1	1	0	0	2	1	123	162	124	3	1	3	8	5	1	6	6	6	1	0	0	0	0	0	6	6	6	6	6	0	1
449	34	2	1	1	5	2	0	0	0	1	1	1	0	1	0	2	0	0	0	1	0	1	1	0	41	154	70	2	2	2	3	5	1	2	2	2	5	4	4	4	4	4	4	4	4	4	4	0	1
450	47	2	4	1	0	3	0	0	0	1	1	1	0	1	1	3	0	0	0	1	0	0	0	0	65	155	91	2	1	2	2	2	4	3	3	3	3	0	0	0	0	0	4	4	4	4	4	0	0
451	43	2	2	3	18	6	1	1	1	2	1	1	1	3	2	4	1	1	0	1	1	1	2	2	61	161	89	3	3	3	4	4	3	3	3	3	3	6	6	4	4	4	6	6	6	6	6	0	1
452	43	2	3	1	12	3	1	0	1	1	1	1	1	1	1	2	1	0	0	1	0	1	1	1	67	160	88	4	3	2	5	4	3	4	4	4	1	6	4	4	4	4	6	6	6	4	4	0	0
453	35	2	4	1	9	2	0	0	1	0	0	1	0	1	0	2	0	0	0	1	0	0	0	1	58	156	83	3	3	2	5	5	3	1	1	1	1	0	0	0	0	0	5	5	5	5	5	0	0
455	37	2	0	1	5	2	1	0	0	0	0	1	1	1	0	2	0	0	0	1	0	0	0	0	58	160	83	2	1	2	2	4	3	3	3	3	4	4	4	4	4	4	4	4	4	4	4	1	1
456	27	2	2	1	12	2	0	0	0	1	0	1	0	1	0	2	0	0	1	1	0	1	1	1	58	150	84	3	3	3	5	4	2	4	4	4	1	4	4	4	4	4	6	6	6	6	6	0	0
457	31	2	2	1	18	4	1	1	1	1	1	1	1	1	1	2	1	0	0	1	0	1	1	1	61	164	84	3	2	4	3	2	1	4	4	4	3	4	4	4	4	4	6	6	6	6	6	0	1
458	34	1	0	2	14	2	1	0	1	1	0	1	1	1	1	1	1	0	0	1	0	0	0	1	60	161	82	3	3	3	4	4	3	5	5	5	1	#NULL!	#NULL!	#NULL!	#NULL!	#NULL!	6	6	6	6	6	1	1
459	31	2	2	1	16	3	1	0	1	1	1	1	0	1	1	2	1	0	0	1	0	0	1	1	69	162	90	4	4	3	4	3	2	6	6	6	1	0	0	0	0	0	4	4	4	4	4	1	1
460	44	2	1	1	12	3	1	1	1	1	1	1	1	1	2	3	1	0	0	1	0	1	1	1	70	154	100	1	2	4	6	4	2	3	3	3	3	4	3	6	6	6	6	6	6	6	6	0	0
461	44	2	3	1	5	2	0	0	0	1	1	1	1	1	0	2	1	0	0	1	0	0	1	1	103	154	120	1	2	2	9	5	1	6	6	6	1	0	0	0	0	0	6	6	6	6	6	0	0
462	32	2	1	1	8	3	1	0	1	1	0	1	0	0	0	1	0	0	0	0	0	0	0	1	51	154	80	3	3	4	4	4	3	3	3	3	3	4	4	4	4	4	4	4	4	4	4	0	1
463	25	2	2	1	16	3	1	0	1	1	0	1	1	1	0	1	1	0	0	1	0	0	1	1	60	160	77	3	1	3	4	5	2	3	3	3	6	4	3	0	0	0	6	2	1	0	3	1	1
464	37	2	2	15	5	3	1	0	1	1	0	0	1	1	1	2	0	0	0	1	0	0	1	1	62	159	86	2	3	3	5	4	3	4	4	4	3	4	4	4	4	4	6	6	6	6	6	1	0
465	37	2	2	1	12	2	1	0	0	1	0	1	0	0	0	2	0	0	0	1	0	0	0	1	66	156	101	2	2	4	5	4	1	6	6	6	1	0	0	4	4	4	6	6	6	6	6	0	1
466	48	2	1	1	16	3	1	0	1	0	0	1	1	1	0	2	0	0	0	1	0	0	1	1	95	167	115	2	1	1	8	5	1	6	6	6	1	0	0	6	6	6	0	0	0	6	6	0	1
467	31	2	3	1	8	3	0	0	1	1	1	1	0	0	0	2	0	0	0	1	0	0	0	1	61	157	90	3	3	2	5	4	1	5	4	0	1	3	4	4	4	4	4	4	4	4	4	0	1
468	41	2	3	1	5	4	1	0	0	1	0	1	1	1	1	3	0	1	0	1	0	0	1	1	86	153	103	2	3	4	7	4	1	4	4	3	1	#NULL!	#NULL!	#NULL!	#NULL!	#NULL!	6	6	6	6	6	0	1
469	26	2	4	1	4	3	0	0	0	1	0	1	0	1	1	3	0	0	0	1	1	0	1	1	92	160	113	2	3	2	5	1	1	6	6	6	1	0	0	4	4	4	6	6	6	6	6	0	1
470	22	2	1	1	14	2	1	0	1	1	0	1	0	0	0	2	0	0	0	1	0	0	0	1	71	150	100	3	3	2	6	2	1	6	6	5	1	0	0	0	4	0	6	6	6	5	6	0	1
471	26	2	2	5	16	3	1	1	1	1	1	1	1	1	1	2	0	1	1	1	0	0	1	1	75	159	95	3	4	4	5	4	1	6	6	6	1	4	4	4	4	4	6	6	6	6	6	0	1
472	30	2	2	1	12	4	1	0	0	1	1	1	1	1	1	3	0	0	0	1	0	1	1	2	70	170	86	3	3	2	4	4	1	5	3	6	1	5	5	5	4	4	6	6	6	6	6	0	1
473	30	2	1	1	16	2	1	0	1	1	1	1	1	1	1	3	1	0	0	1	0	1	2	1	69	164	93	3	3	1	6	4	1	6	6	6	1	4	4	4	6	6	6	6	6	6	6	0	1
474	40	2	2	1	2	2	1	0	0	1	0	1	1	1	1	2	0	0	0	0	0	0	1	1	70	153	100	3	3	1	8	5	1	6	6	6	1	#NULL!	#NULL!	#NULL!	#NULL!	#NULL!	3	#NULL!	4	4	4	0	1
475	32	2	1	1	16	3	1	0	0	0	1	1	0	1	0	2	0	0	0	1	0	0	1	1	60	163	75	2	2	4	4	4	3	3	3	6	3	4	4	4	6	4	6	6	6	6	6	0	1
476	41	2	3	7	19	4	1	0	1	1	1	1	1	1	0	2	1	0	1	1	0	1	3	1	71	162	105	3	3	3	5	4	1	4	4	4	1	4	4	4	4	4	6	6	6	6	6	0	1
477	30	2	2	1	5	2	0	0	0	1	0	1	1	1	1	1	0	0	1	1	0	1	1	1	70	160	92	2	2	3	4	4	2	5	3	3	1	3	4	4	1	4	5	5	4	3	4	1	1
478	36	2	1	1	14	4	1	0	1	1	1	1	0	1	1	2	1	0	1	1	0	0	1	1	116	175	110	3	3	3	6	4	1	5	5	5	1	2	4	5	6	6	6	6	6	6	6	0	1
479	37	2	2	1	12	1	0	1	1	0	0	1	0	0	0	3	1	0	1	1	0	0	0	1	90	155	105	3	3	4	7	4	1	6	6	6	1	0	0	6	6	6	6	6	6	6	6	0	1
480	42	2	2	2	18	9	1	1	1	2	1	1	1	1	0	5	0	1	1	1	0	1	2	1	65	162	95	5	4	5	4	4	5	4	4	6	1	2	6	6	5	6	6	6	6	6	6	0	1
[truncated: 55 more columns]
